# Supplementary material for: Excited-state dynamics of C3-symmetric heptazine-based thermally activated delayed-fluorescence emitters
Source: Royal Society of Chemistry journal article supplement (doi:10.1039/d3fd00121k), 2023-11-17
Supplement: d3fd00121k1.pdf [file d3fd00121k1.pdf]

Supporting Information for

**Excited-State Dynamics of C<sub>3</sub>-symmetric Heptazine-based Thermally Activated Delayed Fluorescence Emitters**

Katrina Bergmann and Zachary M. Hudson\*

Department of Chemistry, The University of British Columbia, 2036 Main Mall, Vancouver, BC, Canada, V6T 1Z1

Tel: +1-604-822-3266; Fax: +1-604-822-2847; Email: [zhudson@chem.ubc.ca](mailto:zhudson@chem.ubc.ca)

|                                                                                            |     |
|--------------------------------------------------------------------------------------------|-----|
| A. General Information .....                                                               | S2  |
| B. Cartesian coordinates of critical points .....                                          | S4  |
| C. Electronic and vertical excitation energies .....                                       | S21 |
| D. Hole-electron analysis and spin-orbit coupling of low-lying T <sub>n</sub> states ..... | S29 |
| E. Calculation of k <sub>rISC</sub> .....                                                  | S30 |
| F. References .....                                                                        | S32 |

## A. General Information

**Optimal tuning of the range separation parameter:** The optimally tuned LC- $\omega$ PBE/6-31G(d) level of theory was used for all calculations.<sup>1-3</sup> In range-separated (RS) functionals such as LC- $\omega$ PBE, a general expression for the separation of the exchange term into short- and long-range domains is defined by the interelectronic distance  $r$ .

$$\frac{1}{r} = \frac{\alpha + \beta \operatorname{erf}(\omega r)}{r} + \frac{1 - (\alpha + \beta \operatorname{erf}(\omega r))}{r} \quad (\text{S1})$$

In this expression,  $\alpha$ ,  $\beta$  and  $\omega$  are tunable parameters. By using Fock exchange for the first term on the right-hand side of equation S1 but semilocal exchange (such as the Perdew-Burke-Ernzerhof (PBE) functional)<sup>4</sup> for the second term, the exchange functional can be written as

$$E_X = \alpha E_F^{SR} + (1 - \alpha) E_{PBE}^S + (\alpha + \beta) E_F^{LR} + (1 - \alpha - \beta) E_{PBE}^{LR} \quad (\text{S2})$$

where subscripts ‘F’ and ‘PBE’ denote Fock and PBE exchange, and superscripts ‘SR’ and ‘LR’ denote short- and long-range, respectively. In this expression,  $\alpha$  determines the fraction of Fock exchange in the short-range,  $\alpha + \beta$  determines the fraction of Fock exchange in the long-range, and  $\omega$  is the range-separation parameter that determines the transition from short- to long-range.

The value of  $\omega$  must be non-empirically tuned such that the functional fulfills Koopmans’ theorem, a fundamental property of exact Kohn-Sham theory. This theorem equates the vertical ionization potential (IP) of an  $N$ -electron system to the negative of the highest occupied molecular orbital energy ( $\varepsilon_{HOMO}$ ). In donor-acceptor systems, it is also useful to include the electron affinity, which can be equated to the ionization potential of the anionic ( $N + 1$  electron) system.<sup>1</sup> Using default values of  $\alpha$  and  $\beta$  where  $\alpha + \beta = 1$ ,  $\omega$  is optimized in the gas phase to minimize the error measure  $J(\omega)$ :

$$J^2(\omega) = \sum_{i=0}^1 [\varepsilon_{HOMO}^{N+i}(\omega) + \text{IP}^{N+i}(\omega)]^2 \quad (\text{S3})$$

$$\text{IP}(N) = E_{GS}(N - 1) - E_{GS}(N) \quad (\text{S4})$$

For each  $\omega$  value tested, single point energy calculations were carried out on the  $N$ ,  $N - 1$  and  $N + 1$  electron systems in order to calculate  $J(\omega)$ , and minimization of  $J(\omega)$  was conducted using a golden section search. Possible  $\omega$  values for the minimization were limited between 0.0050 and 0.5000, with a tolerance criterion of 0.0010.

**Table S1.** Optimally tuned range separation parameters ( $\omega$ ) for heptazine-based molecules.

|                                | HAP-3MeOCz | HAP-3MeOTPA | HAP-3Cz | HAP-3HMAT |
|--------------------------------|------------|-------------|---------|-----------|
| $\omega$ (bohr <sup>-1</sup> ) | 0.1515     | 0.1458      | 0.1579  | 0.1374    |

**Image-dependent pair potential method:** Rather than a linear interpolation in Cartesian coordinates, which may result in overlap of atoms when generating a path between two states, the image-dependent pair potential (IDPP) method was used. The IDPP method interpolates pairwise distances between neighbouring atoms in the initial and final states and a path is generated to match those distances.<sup>5</sup> Since the number of pairwise distances exceeds the number of atomic coordinates, the path is generated by minimizing the objective function:

$$S_K^{\text{IDPP}}(r_i) = \sum_A^M \sum_{B>A}^M w(d_{AB})(d_{AB}^K - d_{AB})^2$$

Where  $d_{AB}$  is the pairwise distance between atoms A and B for intermediate image  $i$ ,  $d_{AB}^K$  is the ideal interpolated distance between atoms A and B of the same image, and  $w$  is a weight function to give shorter bond distances more weight and make unnecessary bond-breaking unfavourable. The weight function is given as  $w = (d_{AB})^{-4}$ . Eight intermediate images were generated between each state in this study.

## B. Cartesian coordinates of critical points

Table S2. FC Cartesian coordinates of HAP-3MeOCz.

| Atom | X (Å)     | Y (Å)     | Z (Å)     | Atom | X (Å)     | Y (Å)     | Z (Å)     |
|------|-----------|-----------|-----------|------|-----------|-----------|-----------|
| C    | -2.031015 | -1.687992 | 1.658038  | O    | 2.339985  | 2.797008  | -2.946962 |
| N    | -2.343015 | -0.379992 | 1.649038  | O    | -3.592015 | 0.628008  | -2.946962 |
| C    | -1.321015 | 0.489008  | 1.650038  | C    | 1.033985  | -4.113992 | -4.166962 |
| N    | -0.000015 | 0.000008  | 1.666038  | H    | 1.695985  | -3.744992 | -4.973962 |
| C    | 0.235985  | -1.388992 | 1.650038  | H    | 1.179985  | -5.205992 | -4.054962 |
| N    | -0.799015 | -2.232992 | 1.640038  | H    | -0.012015 | -3.916992 | -4.439962 |
| N    | -1.534015 | 1.808008  | 1.640038  | C    | 3.045985  | 2.953008  | -4.166962 |
| C    | -0.447015 | 2.603008  | 1.658038  | H    | 2.395985  | 3.341008  | -4.973962 |
| N    | 0.841985  | 2.219008  | 1.649038  | H    | 3.917985  | 3.625008  | -4.054962 |
| C    | 1.083985  | 0.899008  | 1.650038  | H    | 3.397985  | 1.948008  | -4.439962 |
| N    | 2.332985  | 0.425008  | 1.640038  | C    | -4.080015 | 1.161008  | -4.166962 |
| C    | 2.476985  | -0.914992 | 1.658038  | H    | -4.091015 | 0.404008  | -4.973962 |
| N    | 1.500985  | -1.838992 | 1.649038  | H    | -5.098015 | 1.581008  | -4.054962 |
| C    | -0.707015 | 4.070008  | 1.703038  | H    | -3.386015 | 1.969008  | -4.439962 |
| C    | -1.459015 | 4.589008  | 2.781038  | O    | 4.108985  | -0.249992 | 3.735038  |
| C    | -0.226015 | 4.964008  | 0.721038  | O    | -1.838015 | 3.683008  | 3.735038  |
| C    | -1.737015 | 5.968008  | 2.871038  | O    | -2.271015 | -3.433992 | 3.735038  |
| C    | -0.551015 | 6.346008  | 0.820038  | C    | -2.243015 | -4.388992 | 4.785038  |
| C    | 0.554985  | 4.813008  | -0.502962 | H    | -2.151015 | -5.419992 | 4.396038  |
| C    | -1.288015 | 6.856008  | 1.892038  | H    | -1.353015 | -4.147992 | 5.382038  |
| H    | -2.303015 | 6.359008  | 3.717038  | H    | -3.141015 | -4.320992 | 5.428038  |
| C    | 0.670985  | 6.111008  | -1.074962 | C    | 4.922985  | 0.252008  | 4.785038  |
| C    | 1.133985  | 3.722008  | -1.162962 | H    | 5.769985  | 0.847008  | 4.396038  |
| H    | -1.504015 | 7.923008  | 1.973038  | H    | 4.268985  | 0.902008  | 5.382038  |
| C    | 1.328985  | 6.319008  | -2.289962 | H    | 5.312985  | -0.559992 | 5.428038  |
| C    | 1.803985  | 3.927008  | -2.375962 | C    | -2.680015 | 4.137008  | 4.785038  |
| H    | 1.096985  | 2.713008  | -0.753962 | H    | -3.618015 | 4.573008  | 4.396038  |
| C    | 1.896985  | 5.218008  | -2.937962 | H    | -2.916015 | 3.246008  | 5.382038  |
| H    | 1.392985  | 7.314008  | -2.735962 | H    | -2.172015 | 4.881008  | 5.428038  |
| H    | 2.412985  | 5.375008  | -3.887962 | N    | -0.000015 | 7.037008  | -0.265962 |
| C    | -3.171015 | -2.646992 | 1.703038  | N    | -6.094015 | -3.517992 | -0.265962 |
| C    | -3.245015 | -3.557992 | 2.781038  | N    | 6.093985  | -3.517992 | -0.265962 |
| C    | -4.185015 | -2.677992 | 0.721038  | C    | 7.356985  | -4.114992 | -0.511962 |
| C    | -4.300015 | -4.487992 | 2.871038  | C    | 7.449985  | -5.500992 | -0.726962 |
| C    | -5.221015 | -3.650992 | 0.820038  | C    | 8.518985  | -3.324992 | -0.545962 |
| C    | -4.445015 | -1.925992 | -0.502962 | C    | 8.693985  | -6.085992 | -0.982962 |
| C    | -5.293015 | -4.542992 | 1.892038  | H    | 6.542985  | -6.110992 | -0.678962 |
| H    | -4.356015 | -5.173992 | 3.717038  | C    | 9.761985  | -3.921992 | -0.780962 |
| C    | -5.628015 | -2.474992 | -1.074962 | H    | 8.435985  | -2.244992 | -0.401962 |
| C    | -3.790015 | -0.878992 | -1.162962 | C    | 9.853985  | -5.301992 | -1.004962 |
| H    | -6.110015 | -5.263992 | 1.973038  | H    | 8.757985  | -7.164992 | -1.150962 |
| C    | -6.137015 | -2.007992 | -2.289962 | H    | 10.661985 | -3.300992 | -0.803962 |
| C    | -4.302015 | -0.400992 | -2.375962 | H    | 10.825985 | -5.763992 | -1.195962 |
| H    | -2.898015 | -0.405992 | -0.753962 | C    | -7.243015 | -4.313992 | -0.511962 |
| C    | -5.467015 | -0.965992 | -2.937962 | C    | -8.489015 | -3.700992 | -0.726962 |
| H    | -7.031015 | -2.450992 | -2.735962 | C    | -7.139015 | -5.714992 | -0.545962 |
| H    | -5.861015 | -0.596992 | -3.887962 | C    | -9.617015 | -4.485992 | -0.982962 |
| C    | 3.877985  | -1.422992 | 1.703038  | H    | -8.564015 | -2.610992 | -0.678962 |

|   |          |           |           |   |            |           |           |
|---|----------|-----------|-----------|---|------------|-----------|-----------|
| C | 4.703985 | -1.030992 | 2.781038  | C | -8.278015  | -6.492992 | -0.780962 |
| C | 4.411985 | -2.285992 | 0.721038  | H | -6.162015  | -6.182992 | -0.401962 |
| C | 6.036985 | -1.479992 | 2.871038  | C | -9.518015  | -5.882992 | -1.004962 |
| C | 5.771985 | -2.695992 | 0.820038  | H | -10.584015 | -4.001992 | -1.150962 |
| C | 3.890985 | -2.886992 | -0.502962 | H | -8.190015  | -7.582992 | -0.803962 |
| C | 6.580985 | -2.311992 | 1.892038  | H | -10.405015 | -6.493992 | -1.195962 |
| H | 6.658985 | -1.184992 | 3.717038  | C | -0.114015  | 8.429008  | -0.511962 |
| C | 4.956985 | -3.635992 | -1.074962 | C | 1.038985   | 9.202008  | -0.726962 |
| C | 2.655985 | -2.842992 | -1.162962 | C | -1.380015  | 9.040008  | -0.545962 |
| H | 7.613985 | -2.658992 | 1.973038  | C | 0.923985   | 10.572008 | -0.982962 |
| C | 4.807985 | -4.309992 | -2.289962 | H | 2.019985   | 8.722008  | -0.678962 |
| C | 2.498985 | -3.525992 | -2.375962 | C | -1.484015  | 10.415008 | -0.780962 |
| H | 1.800985 | -2.306992 | -0.753962 | H | -2.274015  | 8.428008  | -0.401962 |
| C | 3.569985 | -4.251992 | -2.937962 | C | -0.336015  | 11.184008 | -1.004962 |
| H | 5.637985 | -4.863992 | -2.735962 | H | 1.825985   | 11.167008 | -1.150962 |
| H | 3.447985 | -4.776992 | -3.887962 | H | -2.472015  | 10.884008 | -0.803962 |
| O | 1.251985 | -3.424992 | -2.946962 | H | -0.422015  | 12.258008 | -1.195962 |

**Table S3.**  $S_{1,\min}$  Cartesian coordinates of HAP-3MeOCz.

| Atom | X (Å)     | Y (Å)     | Z (Å)     | Atom | X (Å)     | Y (Å)     | Z (Å)     |
|------|-----------|-----------|-----------|------|-----------|-----------|-----------|
| C    | -2.200178 | -1.484903 | 2.585058  | O    | 1.401446  | 2.457552  | -2.934121 |
| N    | -2.478132 | -0.154604 | 2.585175  | O    | -1.27229  | -0.20361  | -2.223074 |
| C    | -1.448198 | 0.664601  | 2.433419  | C    | -0.08635  | -3.987952 | -3.734343 |
| N    | -0.12225  | 0.118167  | 2.300197  | H    | 0.356704  | -3.734709 | -4.717387 |
| C    | 0.053013  | -1.309795 | 2.269249  | H    | 0.144948  | -5.045869 | -3.505036 |
| N    | -0.996669 | -2.099546 | 2.422216  | H    | -1.178111 | -3.861567 | -3.791912 |
| N    | -1.598603 | 1.998498  | 2.36489   | C    | 2.225212  | 2.55918   | -4.087227 |
| C    | -0.502723 | 2.723388  | 2.121707  | H    | 1.662255  | 2.899865  | -4.978029 |
| N    | 0.759741  | 2.287839  | 1.890488  | H    | 3.072501  | 3.24852   | -3.916804 |
| C    | 0.957981  | 0.967407  | 1.966471  | H    | 2.612081  | 1.54737   | -4.274695 |
| N    | 2.163602  | 0.442054  | 1.73985   | C    | -0.906649 | 0.066867  | -3.586208 |
| C    | 2.261013  | -0.904549 | 1.83374   | H    | -0.507036 | -0.849694 | -4.047656 |
| N    | 1.292986  | -1.796518 | 2.060422  | H    | -1.770079 | 0.451989  | -4.153864 |
| C    | -0.699202 | 4.211302  | 2.090885  | H    | -0.126966 | 0.83735   | -3.51167  |
| C    | -1.176092 | 4.860501  | 3.25154   | O    | 4.17213   | -0.437213 | 3.712839  |
| C    | -0.430561 | 5.001981  | 0.954252  | O    | -1.365643 | 4.059699  | 4.349403  |
| C    | -1.401522 | 6.25203   | 3.270446  | O    | -3.579079 | -2.763197 | 4.72556   |
| C    | -0.691435 | 6.401123  | 0.990325  | C    | -4.193269 | -3.370571 | 5.862981  |
| C    | 0.091313  | 4.719315  | -0.382732 | H    | -4.129803 | -4.471657 | 5.810061  |
| C    | -1.164981 | 7.035487  | 2.139416  | H    | -3.622572 | -3.011355 | 6.72808   |
| H    | -1.759063 | 6.737591  | 4.179873  | H    | -5.247635 | -3.060003 | 5.960255  |
| C    | 0.122103  | 5.959892  | -1.082999 | C    | 5.124993  | -0.039766 | 4.683587  |
| C    | 0.534529  | 3.558907  | -1.033787 | H    | 5.93509   | 0.567649  | 4.238502  |
| H    | -1.333552 | 8.113812  | 2.166585  | H    | 4.571767  | 0.572059  | 5.409391  |
| C    | 0.552501  | 6.045317  | -2.409484 | H    | 5.571225  | -0.908528 | 5.206951  |
| C    | 0.980024  | 3.647379  | -2.357481 | C    | -1.870006 | 4.661873  | 5.526208  |
| H    | 0.583179  | 2.600649  | -0.51577  | H    | -2.862969 | 5.121993  | 5.363088  |
| C    | 0.983695  | 4.876587  | -3.045902 | H    | -1.968507 | 3.847965  | 6.258372  |
| H    | 0.550205  | 6.996967  | -2.945658 | H    | -1.180206 | 5.429587  | 5.929817  |
| H    | 1.323953  | 4.934403  | -4.082521 | N    | -0.357453 | 6.974368  | -0.247293 |
| C    | -3.387651 | -2.387362 | 2.427268  | N    | -5.192189 | -3.584268 | -0.46358  |

|   |           |           |           |   |           |           |           |
|---|-----------|-----------|-----------|---|-----------|-----------|-----------|
| C | -4.067925 | -3.031882 | 3.49872   | N | 5.536012  | -3.419148 | -0.745377 |
| C | -3.864831 | -2.646645 | 1.149629  | C | 6.737038  | -4.008908 | -1.210393 |
| C | -5.178066 | -3.88688  | 3.263494  | C | 6.767184  | -5.370086 | -1.561547 |
| C | -4.959302 | -3.51938  | 0.913499  | C | 7.906938  | -3.236665 | -1.323085 |
| C | -3.431775 | -2.16308  | -0.154078 | C | 7.952208  | -5.944622 | -2.031869 |
| C | -5.636732 | -4.140503 | 1.973399  | H | 5.860872  | -5.970155 | -1.447108 |
| H | -5.689477 | -4.360129 | 4.103015  | C | 9.092116  | -3.826009 | -1.773415 |
| C | -4.279749 | -2.777477 | -1.122817 | H | 7.871462  | -2.173909 | -1.067283 |
| C | -2.4329   | -1.301331 | -0.560493 | C | 9.119532  | -5.178484 | -2.134708 |
| H | -6.493209 | -4.796326 | 1.802462  | H | 7.964858  | -7.004925 | -2.303385 |
| C | -4.104712 | -2.557743 | -2.504507 | H | 9.997447  | -3.217619 | -1.856874 |
| C | -2.256895 | -1.06398  | -1.946949 | H | 10.046481 | -5.633313 | -2.493813 |
| H | -1.771723 | -0.797182 | 0.137753  | C | -6.212348 | -4.368576 | -1.091112 |
| C | -3.089551 | -1.699495 | -2.912791 | C | -7.187772 | -3.735562 | -1.874344 |
| H | -4.747151 | -3.049133 | -3.238866 | C | -6.221324 | -5.758575 | -0.9136   |
| H | -2.935869 | -1.515057 | -3.976678 | C | -8.177656 | -4.508283 | -2.489827 |
| C | 3.648569  | -1.452021 | 1.656107  | H | -7.174687 | -2.64755  | -1.980106 |
| C | 4.618652  | -1.163943 | 2.638797  | C | -7.222117 | -6.519382 | -1.526075 |
| C | 4.038469  | -2.230144 | 0.550337  | H | -5.439489 | -6.232029 | -0.312603 |
| C | 5.943258  | -1.629892 | 2.517032  | C | -8.197022 | -5.897894 | -2.315298 |
| C | 5.387252  | -2.669283 | 0.433338  | H | -8.942514 | -4.019566 | -3.099356 |
| C | 3.338054  | -2.737428 | -0.628063 | H | -7.231909 | -7.60451  | -1.392192 |
| C | 6.340325  | -2.386343 | 1.412253  | H | -8.975775 | -6.497338 | -2.79481  |
| H | 6.676967  | -1.40845  | 3.293929  | C | -0.479296 | 8.344164  | -0.586917 |
| C | 4.295466  | -3.462834 | -1.393249 | C | 0.621529  | 9.043522  | -1.112751 |
| C | 2.018897  | -2.643548 | -1.091202 | C | -1.70188  | 9.013608  | -0.400794 |
| H | 7.366896  | -2.751971 | 1.330533  | C | 0.493039  | 10.393041 | -1.45734  |
| C | 3.959432  | -4.057749 | -2.612161 | H | 1.576248  | 8.524873  | -1.23063  |
| C | 1.678572  | -3.253299 | -2.305813 | C | -1.814164 | 10.368067 | -0.728443 |
| H | 1.248465  | -2.130794 | -0.515133 | H | -2.559148 | 8.459317  | -0.010432 |
| C | 2.640982  | -3.949661 | -3.06418  | C | -0.721645 | 11.061435 | -1.263001 |
| H | 4.70472   | -4.590102 | -3.207455 | H | 1.355373  | 10.928258 | -1.86682  |
| H | 2.373363  | -4.411759 | -4.016377 | H | -2.769489 | 10.880892 | -0.578709 |
| O | 0.354727  | -3.120189 | -2.702944 | H | -0.815862 | 12.119715 | -1.52586  |

**Table S4.**  $T_{1,\min}$  Cartesian coordinates of HAP-3MeOCz.

| Atom | X (Å)     | Y (Å)     | Z (Å)    | Atom | X (Å)     | Y (Å)     | Z (Å)     |
|------|-----------|-----------|----------|------|-----------|-----------|-----------|
| C    | -1.064244 | -2.473544 | 1.461805 | O    | 0.864933  | 3.014685  | -3.190056 |
| N    | -1.827736 | -1.341775 | 1.503081 | O    | -5.450062 | 0.006577  | -0.951147 |
| C    | -1.208124 | -0.176768 | 1.567221 | C    | 2.807151  | -2.925928 | -4.495628 |
| N    | 0.207059  | -0.127793 | 1.618366 | H    | 3.268063  | -2.225139 | -5.218572 |
| C    | 0.938636  | -1.346115 | 1.551201 | H    | 3.377672  | -3.874957 | -4.507097 |
| N    | 0.306105  | -2.497421 | 1.464331 | H    | 1.770319  | -3.126274 | -4.801532 |
| N    | -1.899008 | 0.983405  | 1.582524 | C    | 1.372646  | 3.353104  | -4.469256 |
| C    | -1.180023 | 2.109005  | 1.650394 | H    | 0.567818  | 3.439224  | -5.225029 |
| N    | 0.162056  | 2.243892  | 1.675372 | H    | 1.945787  | 4.299849  | -4.44809  |
| C    | 0.876591  | 1.107511  | 1.655812 | H    | 2.045509  | 2.531288  | -4.752094 |
| N    | 2.21202   | 1.13394   | 1.674157 | C    | -6.539324 | 0.544485  | -1.694432 |
| C    | 2.83718   | -0.064865 | 1.652165 | H    | -6.506293 | 0.220737  | -2.750493 |
| N    | 2.291679  | -1.281346 | 1.574508 | H    | -7.51073  | 0.256976  | -1.252658 |
| C    | -1.966775 | 3.383632  | 1.714992 | H    | -6.421697 | 1.634794  | -1.642878 |

|   |           |           |           |   |           |           |           |
|---|-----------|-----------|-----------|---|-----------|-----------|-----------|
| C | -2.736605 | 3.653307  | 2.865706  | O | 4.063092  | 0.924737  | 3.876736  |
| C | -1.961458 | 4.333195  | 0.677119  | O | -2.670044 | 2.707981  | 3.858871  |
| C | -3.484906 | 4.842482  | 2.973934  | O | -0.110226 | -4.67556  | 2.814499  |
| C | -2.749171 | 5.513064  | 0.792518  | C | 0.626459  | -5.749681 | 3.395131  |
| C | -1.29856  | 4.403694  | -0.619851 | H | 1.074233  | -6.388455 | 2.614946  |
| C | -3.498717 | 5.781911  | 1.939278  | H | 1.422164  | -5.270245 | 3.979095  |
| H | -4.061445 | 5.048365  | 3.877428  | H | -0.010831 | -6.360202 | 4.059612  |
| C | -1.71094  | 5.623653  | -1.22555  | C | 4.601829  | 1.599055  | 5.001265  |
| C | -0.428298 | 3.552003  | -1.309122 | H | 5.148834  | 2.514154  | 4.706619  |
| H | -4.074264 | 6.704956  | 2.039866  | H | 3.739182  | 1.878681  | 5.622044  |
| C | -1.286358 | 5.978066  | -2.508747 | H | 5.27654   | 0.948447  | 5.59079   |
| C | 0.011144  | 3.910951  | -2.590409 | C | -3.443343 | 2.924511  | 5.026413  |
| H | -0.064275 | 2.622854  | -0.870855 | H | -4.523843 | 2.993709  | 4.797475  |
| C | -0.420105 | 5.113696  | -3.188258 | H | -3.266679 | 2.04944   | 5.667466  |
| H | -1.624725 | 6.902268  | -2.983243 | H | -3.130319 | 3.838804  | 5.566427  |
| H | -0.084286 | 5.388015  | -4.190197 | N | -2.591078 | 6.293689  | -0.362563 |
| C | -1.750222 | -3.754089 | 1.376987  | N | -4.579412 | -5.356958 | -0.215739 |
| C | -1.120997 | -4.943987 | 1.967199  | N | 7.209271  | -0.833176 | -0.325416 |
| C | -2.994634 | -3.985966 | 0.730875  | C | 8.604088  | -0.850582 | -0.573868 |
| C | -1.583378 | -6.251552 | 1.747576  | C | 9.238041  | -2.046702 | -0.953417 |
| C | -3.418785 | -5.343235 | 0.52353   | C | 9.361827  | 0.326802  | -0.445727 |
| C | -4.010516 | -3.152309 | 0.06458   | C | 10.612501 | -2.058343 | -1.210831 |
| C | -2.737902 | -6.482275 | 1.000814  | H | 8.646589  | -2.962814 | -1.03024  |
| H | -1.067208 | -7.095529 | 2.206774  | C | 10.739607 | 0.300416  | -0.68356  |
| C | -4.964684 | -4.045709 | -0.509422 | H | 8.859241  | 1.258672  | -0.173828 |
| C | -4.229152 | -1.785389 | -0.100745 | C | 11.369485 | -0.888522 | -1.071682 |
| H | -3.121035 | -7.488959 | 0.830355  | H | 11.096813 | -2.993626 | -1.506981 |
| C | -6.063372 | -3.624037 | -1.256853 | H | 11.321155 | 1.221303  | -0.580043 |
| C | -5.347144 | -1.3447   | -0.851156 | H | 12.445799 | -0.903215 | -1.265215 |
| H | -3.570373 | -1.050005 | 0.361608  | C | -5.279013 | -6.529218 | -0.641975 |
| C | -6.257656 | -2.249907 | -1.433822 | C | -6.596197 | -6.742333 | -0.210865 |
| H | -6.753738 | -4.346142 | -1.69951  | C | -4.645493 | -7.446182 | -1.492923 |
| H | -7.10858  | -1.89964  | -2.01926  | C | -7.281651 | -7.884091 | -0.638484 |
| C | 4.332314  | -0.006449 | 1.729568  | H | -7.066076 | -6.020551 | 0.462211  |
| C | 4.929467  | 0.545779  | 2.883376  | C | -5.337688 | -8.589111 | -1.90647  |
| C | 5.172735  | -0.471226 | 0.698817  | H | -3.623905 | -7.251495 | -1.829141 |
| C | 6.330088  | 0.647174  | 2.9985    | C | -6.654269 | -8.808402 | -1.48294  |
| C | 6.58382   | -0.327206 | 0.823274  | H | -8.307979 | -8.054627 | -0.302275 |
| C | 4.936392  | -1.09391  | -0.600374 | H | -4.846775 | -9.306067 | -2.570106 |
| C | 7.169077  | 0.215114  | 1.968886  | H | -7.192773 | -9.701281 | -1.812079 |
| H | 6.777742  | 1.063071  | 3.902751  | C | -3.206477 | 7.544956  | -0.610989 |
| C | 6.213647  | -1.297008 | -1.195935 | C | -2.428977 | 8.649064  | -1.002905 |
| C | 3.785495  | -1.472594 | -1.301925 | C | -4.59773  | 7.691495  | -0.469139 |
| H | 8.253941  | 0.294111  | 2.070021  | C | -3.041303 | 9.8798    | -1.258997 |
| C | 6.343594  | -1.83618  | -2.478361 | H | -1.345283 | 8.534995  | -1.088987 |
| C | 3.913006  | -2.025958 | -2.582812 | C | -5.198175 | 8.932087  | -0.705757 |
| H | 2.790135  | -1.366415 | -0.871475 | H | -5.200019 | 6.824133  | -0.186533 |
| C | 5.183178  | -2.200781 | -3.170271 | C | -4.42534  | 10.028818 | -1.10655  |
| H | 7.324388  | -1.963334 | -2.942728 | H | -2.427691 | 10.732655 | -1.564048 |
| H | 5.280618  | -2.622978 | -4.172364 | H | -6.28118  | 9.036605  | -0.590566 |
| O | 2.727961  | -2.370495 | -3.195053 | H | -4.899402 | 10.995456 | -1.298798 |

**Table S5.** FC Cartesian coordinates of **HAP-3MeOTPA**.

| Atom | X (Å)      | Y (Å)     | Z (Å)     | Atom | X (Å)      | Y(Å)       | Z(Å)      |
|------|------------|-----------|-----------|------|------------|------------|-----------|
| C    | 6.312985   | 9.094029  | -1.413779 | C    | 2.361985   | -4.396971  | 0.205221  |
| C    | 5.899985   | 9.574029  | -0.155779 | C    | 9.530985   | -5.640971  | 1.778221  |
| C    | 4.671985   | 9.190029  | 0.374221  | C    | 3.843985   | -11.449971 | -3.101779 |
| C    | 3.815985   | 8.332029  | -0.344779 | C    | 11.901985  | -5.845971  | 1.677221  |
| C    | 4.225985   | 7.871029  | -1.604779 | C    | -11.838015 | 2.396029   | -3.101779 |
| C    | 5.469985   | 8.234029  | -2.135779 | C    | -11.014015 | -7.383971  | 1.677221  |
| N    | 2.544985   | 7.964029  | 0.195221  | C    | -0.888015  | 13.231029  | 1.677221  |
| C    | 2.117985   | 6.627029  | 0.193221  | C    | 7.993985   | 9.054029   | -3.101779 |
| C    | 0.738985   | 6.307029  | 0.176221  | H    | 6.568985   | 10.239029  | 0.394221  |
| C    | 1.104985   | 8.863029  | 1.986221  | H    | 4.359985   | 9.557029   | 1.356221  |
| C    | 1.714985   | 9.001029  | 0.722221  | H    | 3.565985   | 7.212029   | -2.174779 |
| C    | 1.517985   | 10.189029 | 0.004221  | H    | 5.759985   | 7.851029   | -3.115779 |
| C    | 3.054985   | 5.566029  | 0.209221  | H    | -0.000015  | 7.111029   | 0.150221  |
| C    | 2.626985   | 4.244029  | 0.205221  | H    | 1.258985   | 7.946029   | 2.560221  |
| C    | 0.319985   | 4.981029  | 0.178221  | H    | 1.990985   | 10.306029  | -0.974779 |
| C    | 0.307985   | 9.881029  | 2.501221  | H    | 4.122985   | 5.793029   | 0.236221  |
| C    | 0.119985   | 11.074029 | 1.778221  | H    | 3.351985   | 3.426029   | 0.228221  |
| C    | 0.735985   | 11.227029 | 0.526221  | H    | -0.744015  | 4.736029   | 0.155221  |
| C    | 1.253985   | 3.925029  | 0.191221  | H    | -0.170015  | 9.782029   | 3.479221  |
| C    | 0.805985   | 2.524029  | 0.189221  | H    | 0.607985   | 12.140029  | -0.057779 |
| N    | -0.529015  | 2.312029  | 0.192221  | H    | -3.729015  | -3.011971  | 0.155221  |
| C    | -0.949015  | 1.044029  | 0.189221  | H    | -6.158015  | -3.555971  | 0.150221  |
| N    | -0.000015  | 0.000029  | 0.189221  | H    | -7.079015  | 0.674029   | 0.236221  |
| C    | 1.377985   | 0.300029  | 0.189221  | H    | -4.643015  | 1.190029   | 0.228221  |
| N    | 1.770985   | 1.577029  | 0.185221  | H    | -10.457015 | -1.002971  | 1.356221  |
| N    | -2.251015  | 0.745029  | 0.185221  | H    | -9.920015  | -3.428971  | -0.974779 |
| C    | -2.588015  | -0.563971 | 0.189221  | H    | -7.510015  | -2.881971  | 2.560221  |
| N    | -1.738015  | -1.613971 | 0.192221  | H    | -8.028015  | -0.517971  | -2.174779 |
| C    | -0.429015  | -1.343971 | 0.189221  | H    | -9.679015  | 1.063029   | -3.115779 |
| N    | 0.479985   | -2.321971 | 0.185221  | H    | -12.152015 | 0.570029   | 0.394221  |
| C    | 1.781985   | -1.959971 | 0.189221  | H    | -10.818015 | -5.543971  | -0.057779 |
| N    | 2.265985   | -0.697971 | 0.192221  | H    | -8.386015  | -5.038971  | 3.479221  |
| C    | -4.026015  | -0.876971 | 0.191221  | H    | 5.582985   | -10.808971 | 0.394221  |
| C    | -4.474015  | -2.212971 | 0.178221  | H    | 6.096985   | -8.554971  | 1.356221  |
| C    | -5.831015  | -2.513971 | 0.176221  | H    | 4.461985   | -6.693971  | -2.174779 |
| C    | -6.798015  | -1.479971 | 0.193221  | H    | 3.918985   | -8.913971  | -3.115779 |
| C    | -6.348015  | -0.136971 | 0.209221  | H    | 6.251985   | -5.062971  | 2.560221  |
| C    | -4.989015  | 0.153029  | 0.205221  | H    | 6.157985   | -3.555971  | 0.150221  |
| N    | -8.170015  | -1.777971 | 0.195221  | H    | 2.954985   | -6.467971  | 0.236221  |
| C    | -9.124015  | -0.860971 | -0.344779 | H    | 7.929985   | -6.876971  | -0.974779 |
| C    | -10.295015 | -0.548971 | 0.374221  | H    | 10.209985  | -6.596971  | -0.057779 |
| C    | -9.583015  | -3.779971 | 0.004221  | H    | 8.556985   | -4.742971  | 3.479221  |
| C    | -8.652015  | -3.015971 | 0.722221  | H    | 4.472985   | -1.722971  | 0.155221  |
| C    | -8.229015  | -3.474971 | 1.986221  | H    | 1.290985   | -4.615971  | 0.228221  |
| C    | -8.929015  | -0.275971 | -1.604779 | H    | 3.733985   | -12.532971 | -3.250779 |
| C    | -9.866015  | 0.620029  | -2.135779 | H    | 4.458985   | -11.029971 | -3.919779 |
| C    | -11.241015 | 0.322029  | -0.155779 | H    | 2.844985   | -10.975971 | -3.119779 |
| C    | -10.091015 | -4.975971 | 0.526221  | H    | 12.753985  | -5.586971  | 2.321221  |
| C    | -9.650015  | -5.432971 | 1.778221  | H    | 12.003985  | -5.322971  | 0.708221  |
| C    | -8.711015  | -4.673971 | 2.501221  | H    | 11.897985  | -6.937971  | 1.499221  |



|   |            |            |           |   |            |            |           |
|---|------------|------------|-----------|---|------------|------------|-----------|
| C | -11.032015 | 0.920029   | -1.413779 | H | -11.782015 | 1.654029   | -3.919779 |
| C | 4.718985   | -10.013971 | -1.413779 | H | -12.721015 | 3.033029   | -3.250779 |
| C | 5.340985   | -9.895971  | -0.155779 | H | -10.928015 | 3.024029   | -3.119779 |
| C | 5.622985   | -8.640971  | 0.374221  | H | -11.216015 | -8.251971  | 2.321221  |
| C | 5.307985   | -7.470971  | -0.344779 | H | -10.612015 | -7.734971  | 0.708221  |
| C | 4.703985   | -7.594971  | -1.604779 | H | -11.958015 | -6.834971  | 1.499221  |
| C | 4.395985   | -8.853971  | -2.135779 | H | -1.393015  | 13.057029  | 0.708221  |
| N | 5.624985   | -6.185971  | 0.195221  | H | -1.538015  | 13.839029  | 2.321221  |
| C | 6.937985   | -5.984971  | 0.722221  | H | 0.058985   | 13.773029  | 1.499221  |
| C | 7.122985   | -5.388971  | 1.986221  | H | 8.986985   | 9.501029   | -3.250779 |
| C | 5.092985   | -3.792971  | 0.176221  | H | 7.322985   | 9.376029   | -3.919779 |
| C | 4.679985   | -5.146971  | 0.193221  | H | 8.082985   | 7.952029   | -3.119779 |
| C | 3.292985   | -5.428971  | 0.209221  | O | 4.475985   | -11.292971 | -1.836779 |
| C | 8.063985   | -6.408971  | 0.004221  | O | 10.740985  | -5.424971  | 2.381221  |
| C | 9.354985   | -6.250971  | 0.526221  | O | 7.541985   | 9.523029   | -1.836779 |
| C | 8.402985   | -5.207971  | 2.501221  | O | -0.672015  | 12.014029  | 2.381221  |
| C | 4.153985   | -2.767971  | 0.178221  | O | -10.069015 | -6.588971  | 2.381221  |
| C | 2.772985   | -3.048971  | 0.191221  | O | -12.018015 | 1.770029   | -1.836779 |

**Table S6.**  $S_{1,\min}$  Cartesian coordinates of HAP-3MeOTPA.

| Atom | X (Å)     | Y (Å)     | Z (Å)     | Atom | X (Å)      | Y (Å)      | Z (Å)     |
|------|-----------|-----------|-----------|------|------------|------------|-----------|
| C    | 6.312985  | 9.094029  | -1.413779 | C    | 2.361985   | -4.396971  | 0.205221  |
| C    | 5.899985  | 9.574029  | -0.155779 | C    | 9.530985   | -5.640971  | 1.778221  |
| C    | 4.671985  | 9.190029  | 0.374221  | C    | 3.843985   | -11.449971 | -3.101779 |
| C    | 3.815985  | 8.332029  | -0.344779 | C    | 11.901985  | -5.845971  | 1.677221  |
| C    | 4.225985  | 7.871029  | -1.604779 | C    | -11.838015 | 2.396029   | -3.101779 |
| C    | 5.469985  | 8.234029  | -2.135779 | C    | -11.014015 | -7.383971  | 1.677221  |
| N    | 2.544985  | 7.964029  | 0.195221  | C    | -0.888015  | 13.231029  | 1.677221  |
| C    | 2.117985  | 6.627029  | 0.193221  | C    | 7.993985   | 9.054029   | -3.101779 |
| C    | 0.738985  | 6.307029  | 0.176221  | H    | 6.568985   | 10.239029  | 0.394221  |
| C    | 1.104985  | 8.863029  | 1.986221  | H    | 4.359985   | 9.557029   | 1.356221  |
| C    | 1.714985  | 9.001029  | 0.722221  | H    | 3.565985   | 7.212029   | -2.174779 |
| C    | 1.517985  | 10.189029 | 0.004221  | H    | 5.759985   | 7.851029   | -3.115779 |
| C    | 3.054985  | 5.566029  | 0.209221  | H    | -0.000015  | 7.111029   | 0.150221  |
| C    | 2.626985  | 4.244029  | 0.205221  | H    | 1.258985   | 7.946029   | 2.560221  |
| C    | 0.319985  | 4.981029  | 0.178221  | H    | 1.990985   | 10.306029  | -0.974779 |
| C    | 0.307985  | 9.881029  | 2.501221  | H    | 4.122985   | 5.793029   | 0.236221  |
| C    | 0.119985  | 11.074029 | 1.778221  | H    | 3.351985   | 3.426029   | 0.228221  |
| C    | 0.735985  | 11.227029 | 0.526221  | H    | -0.744015  | 4.736029   | 0.155221  |
| C    | 1.253985  | 3.925029  | 0.191221  | H    | -0.170015  | 9.782029   | 3.479221  |
| C    | 0.805985  | 2.524029  | 0.189221  | H    | 0.607985   | 12.140029  | -0.057779 |
| N    | -0.529015 | 2.312029  | 0.192221  | H    | -3.729015  | -3.011971  | 0.155221  |
| C    | -0.949015 | 1.044029  | 0.189221  | H    | -6.158015  | -3.555971  | 0.150221  |
| N    | -0.000015 | 0.000029  | 0.189221  | H    | -7.079015  | 0.674029   | 0.236221  |
| C    | 1.377985  | 0.300029  | 0.189221  | H    | -4.643015  | 1.190029   | 0.228221  |
| N    | 1.770985  | 1.577029  | 0.185221  | H    | -10.457015 | -1.002971  | 1.356221  |
| N    | -2.251015 | 0.745029  | 0.185221  | H    | -9.920015  | -3.428971  | -0.974779 |
| C    | -2.588015 | -0.563971 | 0.189221  | H    | -7.510015  | -2.881971  | 2.560221  |
| N    | -1.738015 | -1.613971 | 0.192221  | H    | -8.028015  | -0.517971  | -2.174779 |
| C    | -0.429015 | -1.343971 | 0.189221  | H    | -9.679015  | 1.063029   | -3.115779 |
| N    | 0.479985  | -2.321971 | 0.185221  | H    | -12.152015 | 0.570029   | 0.394221  |

|   |            |            |           |   |            |            |           |
|---|------------|------------|-----------|---|------------|------------|-----------|
| C | 1.781985   | -1.959971  | 0.189221  | H | -10.818015 | -5.543971  | -0.057779 |
| N | 2.265985   | -0.697971  | 0.192221  | H | -8.386015  | -5.038971  | 3.479221  |
| C | -4.026015  | -0.876971  | 0.191221  | H | 5.582985   | -10.808971 | 0.394221  |
| C | -4.474015  | -2.212971  | 0.178221  | H | 6.096985   | -8.554971  | 1.356221  |
| C | -5.831015  | -2.513971  | 0.176221  | H | 4.461985   | -6.693971  | -2.174779 |
| C | -6.798015  | -1.479971  | 0.193221  | H | 3.918985   | -8.913971  | -3.115779 |
| C | -6.348015  | -0.136971  | 0.209221  | H | 6.251985   | -5.062971  | 2.560221  |
| C | -4.989015  | 0.153029   | 0.205221  | H | 6.157985   | -3.555971  | 0.150221  |
| N | -8.170015  | -1.777971  | 0.195221  | H | 2.954985   | -6.467971  | 0.236221  |
| C | -9.124015  | -0.860971  | -0.344779 | H | 7.929985   | -6.876971  | -0.974779 |
| C | -10.295015 | -0.548971  | 0.374221  | H | 10.209985  | -6.596971  | -0.057779 |
| C | -9.583015  | -3.779971  | 0.004221  | H | 8.556985   | -4.742971  | 3.479221  |
| C | -8.652015  | -3.015971  | 0.722221  | H | 4.472985   | -1.722971  | 0.155221  |
| C | -8.229015  | -3.474971  | 1.986221  | H | 1.290985   | -4.615971  | 0.228221  |
| C | -8.929015  | -0.275971  | -1.604779 | H | 3.733985   | -12.532971 | -3.250779 |
| C | -9.866015  | 0.620029   | -2.135779 | H | 4.458985   | -11.029971 | -3.919779 |
| C | -11.241015 | 0.322029   | -0.155779 | H | 2.844985   | -10.975971 | -3.119779 |
| C | -10.091015 | -4.975971  | 0.526221  | H | 12.753985  | -5.586971  | 2.321221  |
| C | -9.650015  | -5.432971  | 1.778221  | H | 12.003985  | -5.322971  | 0.708221  |
| C | -8.711015  | -4.673971  | 2.501221  | H | 11.897985  | -6.937971  | 1.499221  |
| C | -11.032015 | 0.920029   | -1.413779 | H | -11.782015 | 1.654029   | -3.919779 |
| C | 4.718985   | -10.013971 | -1.413779 | H | -12.721015 | 3.033029   | -3.250779 |
| C | 5.340985   | -9.895971  | -0.155779 | H | -10.928015 | 3.024029   | -3.119779 |
| C | 5.622985   | -8.640971  | 0.374221  | H | -11.216015 | -8.251971  | 2.321221  |
| C | 5.307985   | -7.470971  | -0.344779 | H | -10.612015 | -7.734971  | 0.708221  |
| C | 4.703985   | -7.594971  | -1.604779 | H | -11.958015 | -6.834971  | 1.499221  |
| C | 4.395985   | -8.853971  | -2.135779 | H | -1.393015  | 13.057029  | 0.708221  |
| N | 5.624985   | -6.185971  | 0.195221  | H | -1.538015  | 13.839029  | 2.321221  |
| C | 6.937985   | -5.984971  | 0.722221  | H | 0.058985   | 13.773029  | 1.499221  |
| C | 7.122985   | -5.388971  | 1.986221  | H | 8.986985   | 9.501029   | -3.250779 |
| C | 5.092985   | -3.792971  | 0.176221  | H | 7.322985   | 9.376029   | -3.919779 |
| C | 4.679985   | -5.146971  | 0.193221  | H | 8.082985   | 7.952029   | -3.119779 |
| C | 3.292985   | -5.428971  | 0.209221  | O | 4.475985   | -11.292971 | -1.836779 |
| C | 8.063985   | -6.408971  | 0.004221  | O | 10.740985  | -5.424971  | 2.381221  |
| C | 9.354985   | -6.250971  | 0.526221  | O | 7.541985   | 9.523029   | -1.836779 |
| C | 8.402985   | -5.207971  | 2.501221  | O | -0.672015  | 12.014029  | 2.381221  |
| C | 4.153985   | -2.767971  | 0.178221  | O | -10.069015 | -6.588971  | 2.381221  |
| C | 2.772985   | -3.048971  | 0.191221  | O | -12.018015 | 1.770029   | -1.836779 |

**Table S7.**  $T_{1,\min}$  Cartesian coordinates of HAP-3MeOTPA.

| Atom | X (Å)     | Y (Å)      | Z (Å)     | Atom | X (Å)      | Y (Å)      | Z (Å)     |
|------|-----------|------------|-----------|------|------------|------------|-----------|
| C    | -2.7376   | -10.639802 | 1.800025  | C    | 4.917924   | 1.174953   | -0.201472 |
| C    | -3.328736 | -10.741855 | 0.527246  | C    | 10.45155   | -2.859803  | -2.630063 |
| C    | -3.806284 | -9.606741  | -0.121236 | C    | 10.658788  | 3.927935   | 4.335487  |
| C    | -3.727042 | -8.339729  | 0.492489  | C    | 12.225818  | -4.384574  | -3.100606 |
| C    | -3.150085 | -8.248171  | 1.768697  | C    | -9.389499  | 7.224646   | 3.443375  |
| C    | -2.644599 | -9.382348  | 2.416937  | C    | -1.943192  | 13.068381  | -2.138094 |
| N    | -4.237205 | -7.184366  | -0.167693 | C    | -10.311416 | -8.134438  | -2.146665 |
| C    | -3.508428 | -5.973357  | -0.168004 | C    | -1.687116  | -11.745702 | 3.629556  |
| C    | -4.175646 | -4.728818  | -0.167597 | H    | -3.388594  | -11.726753 | 0.05675   |
| C    | -5.714553 | -6.719525  | -2.085214 | H    | -4.253275  | -9.692591  | -1.115259 |

|   |           |           |           |   |            |            |           |
|---|-----------|-----------|-----------|---|------------|------------|-----------|
| C | -5.512675 | -7.263378 | -0.799589 | H | -3.08638   | -7.27299   | 2.25884   |
| C | -6.588266 | -7.90339  | -0.165708 | H | -2.196411  | -9.270676  | 3.406423  |
| C | -2.095551 | -5.982566 | -0.172218 | H | -5.268182  | -4.704527  | -0.154144 |
| C | -1.380992 | -4.78782  | -0.170253 | H | -4.884216  | -6.222072  | -2.593396 |
| C | -3.452257 | -3.538439 | -0.176004 | H | -6.445094  | -8.329222  | 0.831087  |
| C | -6.958206 | -6.803214 | -2.703782 | H | -1.564941  | -6.937989  | -0.184195 |
| C | -8.029776 | -7.455423 | -2.065745 | H | -0.288227  | -4.791474  | -0.180295 |
| C | -7.83636  | -8.013317 | -0.792438 | H | -3.96583   | -2.573964  | -0.169866 |
| C | -2.045183 | -3.546739 | -0.174263 | H | -7.121862  | -6.380149  | -3.698283 |
| C | -1.280043 | -2.277242 | -0.177294 | H | -8.648786  | -8.522948  | -0.270251 |
| N | -2.01364  | -1.139004 | -0.189735 | H | -0.178301  | 4.797762   | -0.171186 |
| C | -1.339762 | 0.015696  | -0.192501 | H | -1.405638  | 6.972449   | -0.167982 |
| N | 0.065996  | -0.000628 | -0.188079 | H | -5.157788  | 4.824248   | -0.273433 |
| C | 0.76894   | -1.237676 | -0.174118 | H | -3.904593  | 2.664694   | -0.25278  |
| N | 0.057504  | -2.381821 | -0.16639  | H | -6.242156  | 8.50114    | -1.223452 |
| N | -1.98664  | 1.185673  | -0.198882 | H | -4.041341  | 9.76187    | 0.77998   |
| C | -1.226766 | 2.306689  | -0.203461 | H | -2.855479  | 7.389994   | -2.621678 |
| N | 0.11283   | 2.380273  | -0.202766 | H | -4.760741  | 6.311542   | 2.184172  |
| C | 0.797497  | 1.219876  | -0.194779 | H | -6.966636  | 6.490451   | 3.280764  |
| N | 2.117953  | 1.196735  | -0.194374 | H | -8.468223  | 8.720279   | -0.102632 |
| C | 2.72637   | -0.031499 | -0.181714 | H | -3.123887  | 11.790319  | -0.292074 |
| N | 2.089655  | -1.245264 | -0.168024 | H | -1.890183  | 9.431034   | -3.69585  |
| C | -1.962456 | 3.593416  | -0.210364 | H | 11.942553  | 2.732735   | 0.788187  |
| C | -1.270631 | 4.818779  | -0.196177 | H | 10.757057  | 1.126021   | -0.71239  |
| C | -1.958078 | 6.029824  | -0.195305 | H | 7.627402   | 0.707457   | 2.245795  |
| C | -3.370322 | 6.052819  | -0.220989 | H | 8.791716   | 2.309619   | 3.724644  |
| C | -4.065367 | 4.823374  | -0.241999 | H | 7.675342   | -0.858843  | -2.61059  |
| C | -3.369573 | 3.61721   | -0.230961 | H | 6.812016   | -2.253127  | -0.129418 |
| N | -4.073233 | 7.278927  | -0.226291 | H | 6.860158   | 2.096534   | -0.235728 |
| C | -5.34677  | 7.388622  | 0.405238  | H | 10.686604  | -1.397861  | 0.448342  |
| C | -6.404652 | 8.067961  | -0.232881 | H | 11.879037  | -3.012789  | -0.986953 |
| C | -3.572525 | 9.685265  | -0.204771 | H | 8.877189   | -2.505627  | -4.063035 |
| C | -3.511835 | 8.435888  | -0.840482 | H | 4.311945   | -2.213564  | -0.137697 |
| C | -2.904618 | 8.355416  | -2.111119 | H | 4.359695   | 2.112669   | -0.234787 |
| C | -5.573225 | 6.837821  | 1.676028  | H | 11.385773  | 4.647205   | 4.73461   |
| C | -6.8255   | 6.939091  | 2.295291  | H | 10.563723  | 3.076402   | 5.03253   |
| C | -7.644294 | 8.194631  | 0.387025  | H | 9.677804   | 4.421541   | 4.219079  |
| C | -3.052997 | 10.8343   | -0.81503  | H | 12.504261  | -5.033905  | -3.940868 |
| C | -2.43783  | 10.739379 | -2.072923 | H | 12.073808  | -4.999998  | -2.195978 |
| C | -2.364286 | 9.488022  | -2.71257  | H | 13.033109  | -3.652774  | -2.918368 |
| C | -7.868774 | 7.625669  | 1.654285  | H | -8.741039  | 7.658688   | 4.227678  |
| C | 10.455794 | 2.622161  | 2.349227  | H | -10.438668 | 7.460469   | 3.670049  |
| C | 11.003063 | 2.267412  | 1.095361  | H | -9.256436  | 6.126502   | 3.433708  |
| C | 10.344577 | 1.371093  | 0.269176  | H | -1.458571  | 13.764881  | -2.836565 |
| C | 9.115078  | 0.796137  | 0.675934  | H | -1.398296  | 13.079998  | -1.17526  |
| C | 8.569918  | 1.157048  | 1.926173  | H | -2.986423  | 13.393545  | -1.964496 |
| C | 9.232059  | 2.058827  | 2.758251  | H | -10.593427 | -7.637057  | -1.199579 |
| N | 8.416683  | -0.094499 | -0.165229 | H | -11.144952 | -8.056453  | -2.858615 |
| C | 9.111297  | -1.005467 | -0.989967 | H | -10.103843 | -9.202222  | -1.944233 |
| C | 8.593177  | -1.339148 | -2.264795 | H | -1.395533  | -12.774645 | 3.882752  |
| C | 6.268057  | -1.304729 | -0.169245 | H | -2.394251  | -11.369357 | 4.39268   |
| C | 6.999973  | -0.080196 | -0.177613 | H | -0.787112  | -11.102286 | 3.625387  |
| C | 6.295015  | 1.160756  | -0.193026 | O | 11.183234  | 3.510859   | 3.073571  |

|   |           |           |           |   |           |            |           |
|---|-----------|-----------|-----------|---|-----------|------------|-----------|
| C | 10.300602 | -1.622039 | -0.549053 | O | 11.016931 | -3.737542  | -3.498529 |
| C | 10.969152 | -2.539016 | -1.359322 | O | -2.288783 | -11.816486 | 2.344143  |
| C | 9.257532  | -2.249254 | -3.071666 | O | -9.206705 | -7.492665  | -2.768685 |
| C | 4.890914  | -1.288362 | -0.165223 | O | -1.88667  | 11.791683  | -2.759019 |
| C | 4.167382  | -0.048164 | -0.182422 | O | -9.128463 | 7.796795   | 2.168767  |

**Table S8.** FC Cartesian coordinates of **HAP-3Cz**.

| Atom | X (Å)  | Y (Å)     | Z (Å)  | Atom | X (Å)   | Y (Å)      | Z (Å)  |
|------|--------|-----------|--------|------|---------|------------|--------|
| C    | -2.291 | 1.322009  | 0      | H    | 1.791   | -7.770991  | 2.165  |
| N    | -1.164 | 2.064009  | -0.003 | C    | 1.097   | -11.547991 | 1.286  |
| C    | 0      | 1.409009  | 0      | C    | -1.968  | -11.201991 | -2.321 |
| N    | 0      | 0.000009  | 0      | H    | -2.887  | -9.597991  | -3.452 |
| C    | -1.22  | -0.703991 | 0      | H    | -0.895  | -12.598991 | -1.057 |
| N    | -2.369 | -0.023991 | 0.003  | C    | 1.968   | -11.201991 | 2.321  |
| N    | 1.164  | 2.064009  | 0.003  | H    | 2.887   | -9.597991  | 3.452  |
| C    | 2.291  | 1.322009  | 0      | H    | 0.895   | -12.598991 | 1.057  |
| N    | 2.369  | -0.023991 | -0.003 | H    | -2.459  | -11.985991 | -2.904 |
| C    | 1.22   | -0.703991 | 0      | H    | 2.459   | -11.985991 | 2.904  |
| N    | 1.205  | -2.039991 | 0.003  | C    | -8.318  | 3.935009   | 0.857  |
| C    | 0      | -2.644991 | 0      | C    | -7.567  | 5.236009   | -0.857 |
| N    | -1.205 | -2.039991 | -0.003 | C    | -8.439  | 3.016009   | 1.908  |
| C    | -3.572 | 2.062009  | 0      | C    | -9.358  | 4.852009   | 0.547  |
| C    | -3.58  | 3.469009  | 0.012  | C    | -6.831  | 5.801009   | -1.908 |
| C    | -4.795 | 1.366009  | -0.012 | C    | -8.88   | 5.678009   | -0.547 |
| C    | -4.786 | 4.168009  | 0.02   | C    | -9.636  | 3.009009   | 2.628  |
| H    | -2.626 | 4.000009  | 0.033  | H    | -7.625  | 2.334009   | 2.165  |
| C    | -6.002 | 2.060009  | -0.02  | C    | -10.55  | 4.824009   | 1.286  |
| H    | -4.777 | 0.274009  | -0.033 | C    | -7.424  | 6.840009   | -2.628 |
| C    | -6.006 | 3.468009  | 0      | H    | -5.834  | 5.437009   | -2.165 |
| H    | -4.793 | 5.260009  | 0.063  | C    | -9.452  | 6.724009   | -1.286 |
| H    | -6.952 | 1.521009  | -0.063 | C    | -10.685 | 3.897009   | 2.321  |
| C    | 0      | -4.123991 | 0      | H    | -9.755  | 2.299009   | 3.452  |
| C    | -1.214 | -4.834991 | 0.012  | H    | -11.358 | 5.524009   | 1.057  |
| C    | 1.214  | -4.834991 | -0.012 | C    | -8.717  | 7.305009   | -2.321 |
| C    | -1.217 | -6.227991 | 0.02   | H    | -6.868  | 7.299009   | -3.452 |
| H    | -2.151 | -4.273991 | 0.033  | H    | -10.463 | 7.074009   | -1.057 |
| C    | 1.217  | -6.227991 | -0.02  | H    | -11.609 | 3.863009   | 2.904  |
| H    | 2.151  | -4.273991 | -0.033 | H    | -9.15   | 8.122009   | -2.904 |
| C    | 0      | -6.934991 | 0      | C    | 8.318   | 3.935009   | -0.857 |
| H    | -2.158 | -6.780991 | 0.063  | C    | 7.567   | 5.236009   | 0.857  |
| H    | 2.158  | -6.780991 | -0.063 | C    | 8.439   | 3.016009   | -1.908 |
| C    | 3.572  | 2.062009  | 0      | C    | 9.358   | 4.852009   | -0.547 |
| C    | 3.58   | 3.469009  | -0.012 | C    | 6.831   | 5.801009   | 1.908  |
| C    | 4.795  | 1.366009  | 0.012  | C    | 8.88    | 5.678009   | 0.547  |
| C    | 4.786  | 4.168009  | -0.02  | C    | 9.636   | 3.009009   | -2.628 |
| H    | 2.626  | 4.000009  | -0.033 | H    | 7.625   | 2.334009   | -2.165 |
| C    | 6.002  | 2.060009  | 0.02   | C    | 10.55   | 4.824009   | -1.286 |
| H    | 4.777  | 0.274009  | 0.033  | C    | 7.424   | 6.840009   | 2.628  |
| C    | 6.006  | 3.468009  | 0      | H    | 5.834   | 5.437009   | 2.165  |
| H    | 4.793  | 5.260009  | -0.063 | C    | 9.452   | 6.724009   | 1.286  |
| H    | 6.952  | 1.521009  | 0.063  | C    | 10.685  | 3.897009   | -2.321 |

|   |        |            |        |   |        |           |        |
|---|--------|------------|--------|---|--------|-----------|--------|
| C | -0.751 | -9.170991  | -0.857 | H | 9.755  | 2.299009  | -3.452 |
| C | 0.751  | -9.170991  | 0.857  | H | 11.358 | 5.524009  | -1.057 |
| C | -1.608 | -8.815991  | -1.908 | C | 8.717  | 7.305009  | 2.321  |
| C | -0.477 | -10.529991 | -0.547 | H | 6.868  | 7.299009  | 3.452  |
| C | 1.608  | -8.815991  | 1.908  | H | 10.463 | 7.074009  | 1.057  |
| C | 0.477  | -10.529991 | 0.547  | H | 11.609 | 3.863009  | -2.904 |
| C | -2.212 | -9.848991  | -2.628 | H | 9.15   | 8.122009  | 2.904  |
| H | -1.791 | -7.770991  | -2.165 | N | 0      | -8.349991 | 0      |
| C | -1.097 | -11.547991 | -1.286 | N | -7.231 | 4.175009  | 0      |
| C | 2.212  | -9.848991  | 2.628  | N | 7.231  | 4.175009  | 0      |

**Table S9.**  $S_{1,\min}$  Cartesian coordinates of HAP-3Cz.

| Atom | X (Å)     | Y (Å)     | Z (Å)    | Atom | X (Å)      | Y (Å)      | Z (Å)     |
|------|-----------|-----------|----------|------|------------|------------|-----------|
| C    | -2.309943 | 1.324679  | 0.499246 | H    | 1.783431   | -7.967678  | 2.195235  |
| N    | -1.162259 | 2.042252  | 0.614247 | C    | 1.113304   | -11.64193  | 0.940229  |
| C    | -0.003447 | 1.400041  | 0.492247 | C    | -1.905445  | -10.944106 | -2.656772 |
| N    | 0.000031  | -0.000036 | 0.196245 | H    | -2.815696  | -9.237361  | -3.63377  |
| C    | -1.21001  | -0.703165 | 0.492243 | H    | -0.847442  | -12.458637 | -1.523774 |
| N    | -2.349726 | -0.029262 | 0.614244 | C    | 1.968893   | -11.39749  | 2.01523   |
| N    | 1.149901  | 2.048883  | 0.614249 | H    | 2.868913   | -9.910582  | 3.310233  |
| C    | 2.302226  | 1.338511  | 0.499249 | H    | 0.9187     | -12.664884 | 0.605227  |
| N    | 2.349538  | -0.014742 | 0.614247 | H    | -2.388297  | -11.666682 | -3.320774 |
| C    | 1.214737  | -0.696217 | 0.492245 | H    | 2.45487    | -12.233464 | 2.524229  |
| N    | 1.199706  | -2.020708 | 0.614243 | C    | -8.380199  | 3.955871   | 0.742245  |
| C    | 0.00802   | -2.662321 | 0.499241 | C    | -7.496995  | 5.150784   | -0.982753 |
| N    | -1.187187 | -2.02762  | 0.614241 | C    | -8.582753  | 3.100336   | 1.834244  |
| C    | -3.577354 | 2.051639  | 0.376246 | C    | -9.392603  | 4.845823   | 0.296246  |
| C    | -3.5913   | 3.460107  | 0.320248 | C    | -6.678604  | 5.654868   | -2.003751 |
| C    | -4.797938 | 1.351803  | 0.293244 | C    | -8.830165  | 5.605486   | -0.805753 |
| C    | -4.79393  | 4.15062   | 0.192248 | C    | -9.833265  | 3.131154   | 2.457243  |
| H    | -2.646041 | 4.002348  | 0.399249 | H    | -7.792171  | 2.439181   | 2.195243  |
| C    | -6.00022  | 2.039173  | 0.149244 | C    | -10.639293 | 4.856383   | 0.940245  |
| H    | -4.78545  | 0.259725  | 0.331242 | C    | -7.210955  | 6.646077   | -2.83075  |
| C    | -6.007324 | 3.446167  | 0.101246 | H    | -5.663775  | 5.279938   | -2.157751 |
| H    | -4.80523  | 5.243465  | 0.182249 | C    | -9.340649  | 6.603239   | -1.649752 |
| H    | -6.94199  | 1.494134  | 0.054242 | C    | -10.854705 | 3.993386   | 2.015243  |
| C    | 0.011582  | -4.12379  | 0.376239 | H    | -10.017273 | 2.471093   | 3.310242  |
| C    | -1.201194 | -4.839628 | 0.320237 | H    | -11.427621 | 5.53751    | 0.605245  |
| C    | 1.229073  | -4.8308   | 0.293239 | C    | -8.525179  | 7.122272   | -2.65675  |
| C    | -1.197914 | -6.226365 | 0.192235 | H    | -6.591632  | 7.056961   | -3.633749 |
| H    | -2.14309  | -4.292181 | 0.399237 | H    | -10.365898 | 6.963024   | -1.523752 |
| C    | 1.233752  | -6.215791 | 0.149237 | H    | -11.821894 | 3.990842   | 2.524242  |
| H    | 2.167291  | -4.273745 | 0.331241 | H    | -8.909795  | 7.901652   | -3.32075  |
| C    | 0.019305  | -6.925132 | 0.101235 | C    | 8.210078   | 3.917132   | -0.982743 |
| H    | -2.138298 | -6.783976 | 0.182234 | C    | 7.615483   | 5.279749   | 0.742259  |
| H    | 2.176489  | -6.759328 | 0.054237 | C    | 8.236655   | 2.957047   | -2.003744 |
| C    | 3.565864  | 2.072043  | 0.376251 | C    | 9.26981    | 4.843895   | -0.805741 |
| C    | 3.568957  | 3.478889  | 0.293253 | C    | 6.976268   | 5.883772   | 1.834259  |
| C    | 4.791609  | 1.379623  | 0.320251 | C    | 8.892745   | 5.710639   | 0.29626   |
| C    | 4.766561  | 4.176511  | 0.149255 | C    | 9.361376   | 2.921594   | -2.830744 |
| H    | 2.617273  | 4.014122  | 0.331253 | H    | 7.404336   | 2.26468    | -2.157746 |

|   |           |            |           |   |           |           |           |
|---|-----------|------------|-----------|---|-----------|-----------|-----------|
| C | 5.991936  | 2.075637   | 0.192253  | C | 10.388924 | 4.787145  | -1.64974  |
| H | 4.788245  | 0.289935   | 0.399249  | C | 7.628313  | 6.95045   | 2.457261  |
| C | 5.988322  | 3.479835   | 0.101255  | H | 6.007851  | 5.528591  | 2.195258  |
| H | 4.764616  | 5.265297   | 0.054257  | C | 9.52608   | 6.785436  | 0.940262  |
| H | 6.94341   | 1.539426   | 0.182253  | C | 10.430723 | 3.821738  | -2.656741 |
| C | -0.712989 | -9.068019  | -0.982769 | H | 9.407429  | 2.180309  | -3.633745 |
| C | 0.764807  | -9.23573   | 0.742232  | H | 11.213436 | 5.495513  | -1.523738 |
| C | -1.557744 | -8.611036  | -2.003769 | C | 8.8859    | 7.403987  | 2.015263  |
| C | -0.439761 | -10.450461 | -0.80577  | H | 7.148446  | 7.439367  | 3.310261  |
| C | 1.606784  | -8.983245  | 1.834233  | H | 10.509012 | 7.127264  | 0.605263  |
| C | 0.49974   | -10.557547 | 0.29623   | H | 11.298192 | 3.764937  | -3.320741 |
| C | -2.150322 | -9.567765  | -2.83077  | H | 9.367322  | 8.243482  | 2.524264  |
| H | -1.740673 | -7.545693  | -2.157767 | N | 0.023823  | -8.334639 | -0.039767 |
| C | -1.048178 | -11.390484 | -1.649772 | N | -7.230198 | 4.147175  | -0.039754 |
| C | 2.20525   | -10.080744 | 2.457232  | N | 7.206679  | 4.188334  | -0.039743 |

**Table S10.**  $T_{1,\min}$  Cartesian coordinates of HAP-3Cz.

| Atom | X (Å)     | Y (Å)     | Z (Å)    | Atom | X (Å)      | Y (Å)     | Z (Å)     |
|------|-----------|-----------|----------|------|------------|-----------|-----------|
| C    | 0.807186  | 2.538187  | 0.408537 | H    | -7.386012  | -3.418547 | 2.195443  |
| N    | 1.757273  | 1.569094  | 0.503816 | C    | -11.139833 | -3.542173 | 1.003803  |
| C    | 1.371714  | 0.300048  | 0.403279 | C    | -11.154761 | -0.455398 | -2.603091 |
| N    | 0         | 0         | 0.158643 | H    | -9.693988  | 0.790275  | -3.608925 |
| C    | -0.945706 | 1.037915  | 0.403279 | H    | -12.392812 | -1.80587  | -1.444625 |
| N    | -0.528652 | 2.296358  | 0.503015 | C    | -10.702224 | -4.323412 | 2.074248  |
| N    | 2.253031  | -0.690353 | 0.503015 | H    | -9.037504  | -4.88512  | 3.343303  |
| C    | 1.794542  | -1.968137 | 0.408537 | H    | -12.186637 | -3.568276 | 0.686833  |
| N    | 0.480239  | -2.30639  | 0.503816 | H    | -11.973679 | -0.138702 | -3.254597 |
| C    | -0.426008 | -1.337963 | 0.403279 | H    | -11.408488 | -4.973567 | 2.597573  |
| N    | -1.724379 | -1.606005 | 0.503015 | C    | 2.099339   | 9.023929  | 0.765654  |
| C    | -2.601728 | -0.57005  | 0.408537 | C    | 3.46334    | 8.440668  | -0.962143 |
| N    | -2.237512 | 0.737296  | 0.503816 | C    | 1.213831   | 9.024391  | 1.852455  |
| C    | 1.251967  | 3.9332    | 0.309301 | C    | 2.758616   | 10.20832  | 0.342259  |
| C    | 2.626115  | 4.245007  | 0.268647 | C    | 4.133494   | 7.763388  | -1.990456 |
| C    | 0.310972  | 4.98029   | 0.237128 | C    | 3.62592    | 9.837047  | -0.76128  |
| C    | 3.04882   | 5.568143  | 0.165805 | C    | 0.976587   | 10.242377 | 2.49385   |
| H    | 3.354929  | 3.434469  | 0.339045 | H    | 0.732458   | 8.105748  | 2.195443  |
| C    | 0.731371  | 6.302747  | 0.117592 | C    | 2.502304   | 11.418465 | 1.003803  |
| H    | -0.753749 | 4.737636  | 0.262463 | C    | 4.995175   | 8.506118  | -2.801007 |
| C    | 2.10444   | 6.607758  | 0.084654 | H    | 3.982633   | 6.695103  | -2.161541 |
| H    | 4.114443  | 5.810027  | 0.166958 | C    | 4.497688   | 10.559423 | -1.589533 |
| H    | 0         | 7.109888  | 0.029948 | C    | 1.606928   | 11.430104 | 2.074248  |
| C    | -4.032234 | -0.882365 | 0.309301 | H    | 0.288114   | 10.269269 | 3.343303  |
| C    | -4.989341 | 0.151779  | 0.268647 | H    | 3.0031     | 12.338075 | 0.686833  |
| C    | -4.468544 | -2.220836 | 0.237128 | C    | 5.182994   | 9.888005  | -2.603091 |
| C    | -6.346563 | -0.143716 | 0.165805 | H    | 5.531392   | 8.000103  | -3.608925 |
| H    | -4.651802 | 1.18822   | 0.339045 | H    | 4.632476   | 11.635425 | -1.444625 |
| C    | -5.824025 | -2.517987 | 0.117592 | H    | 1.397009   | 12.366824 | 2.597573  |
| H    | -3.726039 | -3.021584 | 0.262463 | H    | 5.86672    | 10.438861 | -3.254597 |
| C    | -6.774706 | -1.48138  | 0.084654 | C    | 5.578163   | -7.219674 | -0.962143 |
| H    | -7.088853 | 0.658199  | 0.166958 | C    | 6.765282   | -6.330045 | 0.765654  |
| H    | -6.157344 | -3.554944 | 0.029948 | C    | 4.656545   | -7.461405 | -1.990456 |

|   |            |           |           |   |           |            |           |
|---|------------|-----------|-----------|---|-----------|------------|-----------|
| C | 2.780268   | -3.050835 | 0.309301  | C | 6.706173  | -8.058663  | -0.76128  |
| C | 4.157572   | -2.759455 | 0.237128  | C | 7.208436  | -5.563404  | 1.852455  |
| C | 2.363226   | -4.396786 | 0.268647  | C | 7.461357  | -7.493192  | 0.342259  |
| C | 5.092654   | -3.78476  | 0.117592  | C | 4.868927  | -8.579007  | -2.801007 |
| H | 4.479787   | -1.716052 | 0.262463  | H | 3.806813  | -6.796613  | -2.161541 |
| C | 3.297743   | -5.424427 | 0.165805  | C | 6.895885  | -9.174824  | -1.589533 |
| H | 1.296873   | -4.622689 | 0.339045  | C | 8.381865  | -5.966938  | 2.49385   |
| C | 4.670266   | -5.126378 | 0.084654  | H | 6.653555  | -4.687201  | 2.195443  |
| H | 6.157344   | -3.554944 | 0.029948  | C | 8.637529  | -7.876292  | 1.003803  |
| H | 2.974409   | -6.468226 | 0.166958  | C | 5.971767  | -9.432607  | -2.603091 |
| C | -9.041503  | -1.220994 | -0.962143 | H | 4.162596  | -8.790378  | -3.608925 |
| C | -8.864621  | -2.693884 | 0.765654  | H | 7.760335  | -9.829555  | -1.444625 |
| C | -8.790039  | -0.301983 | -1.990456 | C | 9.095296  | -7.106692  | 2.074248  |
| C | -10.332093 | -1.778385 | -0.76128  | H | 8.74939   | -5.384148  | 3.343303  |
| C | -8.422268  | -3.460987 | 1.852455  | H | 9.183536  | -8.769799  | 0.686833  |
| C | -10.219973 | -2.715129 | 0.342259  | H | 6.106959  | -10.300159 | -3.254597 |
| C | -9.864102  | 0.072889  | -2.801007 | H | 10.011479 | -7.393257  | 2.597573  |
| H | -7.789446  | 0.10151   | -2.161541 | N | -8.153897 | -1.782821  | -0.031288 |
| C | -11.393573 | -1.3846   | -1.589533 | N | 2.53298   | 7.952893   | -0.031288 |
| C | -9.358452  | -4.275439 | 2.49385   | N | 5.620917  | -6.170072  | -0.031288 |

**Table S11.** FC Cartesian coordinates of **HAP-3HMAT**.

| Atom | X (Å)  | Y (Å)     | Z (Å)    | Atom | X (Å)   | Y (Å)     | Z (Å)    |
|------|--------|-----------|----------|------|---------|-----------|----------|
| C    | 0      | 4.121966  | 0.40672  | H    | -9.333  | -0.157034 | -0.88528 |
| C    | -1.205 | 4.839966  | 0.43272  | H    | -7.884  | -2.690034 | 2.28072  |
| C    | -1.225 | 6.233966  | 0.40172  | H    | -7.062  | -1.188034 | 2.78972  |
| C    | 0      | 6.941966  | 0.27272  | H    | -8.776  | -1.143034 | 2.26272  |
| C    | 1.225  | 6.233966  | 0.40172  | H    | -6.511  | 0.607966  | 1.14172  |
| C    | 1.205  | 4.839966  | 0.43272  | H    | -6.914  | 0.450966  | -0.59228 |
| N    | 0      | 8.340966  | 0.00972  | H    | -8.2    | 0.661966  | 0.63572  |
| C    | 1.228  | 8.927966  | -0.45128 | H    | -9.379  | -5.415034 | 1.30172  |
| C    | 2.45   | 8.224966  | -0.31628 | H    | -11.072 | -5.356034 | 0.73672  |
| C    | 2.506  | 7.023966  | 0.61572  | H    | -10.175 | -6.910034 | 0.73672  |
| C    | -2.507 | 7.023966  | 0.61572  | H    | -10.762 | -7.231034 | -1.66928 |
| C    | -2.45  | 8.224966  | -0.31728 | H    | -11.643 | -5.705034 | -1.66928 |
| C    | -1.228 | 8.927966  | -0.45128 | H    | -10.383 | -5.995034 | -2.90628 |
| C    | -1.226 | 10.208966 | -1.05428 | H    | -6.271  | -5.483034 | 2.28072  |
| C    | 0      | 11.095966 | -0.89228 | H    | -5.378  | -7.029034 | 2.26272  |
| C    | 1.226  | 10.208966 | -1.05428 | H    | -4.56   | -5.522034 | 2.78972  |
| C    | 2.393  | 10.667966 | -1.68028 | H    | -3.526  | -7.432034 | 0.63472  |
| C    | 3.595  | 8.718966  | -0.95528 | H    | -3.066  | -6.213034 | -0.59228 |
| C    | -3.595 | 8.718966  | -0.95628 | H    | -2.729  | -5.943034 | 1.14172  |
| C    | -3.566 | 9.914966  | -1.67228 | C    | 6.804   | -8.046034 | -1.67128 |
| C    | -2.393 | 10.667966 | -1.68028 | C    | 5.754   | -7.473034 | -0.95528 |
| C    | 0      | 11.647966 | 0.56372  | C    | 5.898   | -6.234034 | -0.31628 |
| C    | 0      | 12.298966 | -1.84828 | C    | 7.118   | -5.527034 | -0.45128 |
| C    | -2.503 | 7.553966  | 2.07972  | C    | 8.228   | -6.166034 | -1.05428 |
| C    | -3.771 | 6.172966  | 0.42772  | C    | 8.043   | -7.406034 | -1.68028 |
| C    | 2.502  | 7.553966  | 2.07972  | N    | 7.223   | -4.170034 | 0.00972  |
| C    | 3.771  | 6.172966  | 0.42772  | C    | 8.346   | -3.400034 | -0.45128 |
| C    | 3.566  | 9.914966  | -1.67128 | C    | 9.454   | -4.043034 | -1.05428 |

|   |         |           |          |   |        |           |          |
|---|---------|-----------|----------|---|--------|-----------|----------|
| H | -2.133  | 4.268966  | 0.48472  | C | 9.61   | -5.548034 | -0.89228 |
| H | 2.133   | 4.268966  | 0.48472  | C | 4.83   | -5.683034 | 0.61572  |
| H | 2.386   | 11.638966 | -2.17928 | C | 4.786  | -4.178034 | 0.40172  |
| H | 4.53    | 8.160966  | -0.88528 | C | 6.012  | -3.471034 | 0.27272  |
| H | -4.53   | 8.160966  | -0.88528 | C | 6.011  | -2.056034 | 0.40172  |
| H | -4.464  | 10.280966 | -2.17828 | C | 7.336  | -1.341034 | 0.61572  |
| H | -2.386  | 11.638966 | -2.17928 | C | 8.348  | -1.990034 | -0.31728 |
| H | 0       | 10.829966 | 1.30172  | C | 9.348  | -1.246034 | -0.95628 |
| H | 0.897   | 12.266966 | 0.73672  | C | 10.435 | -3.262034 | -1.68028 |
| H | -0.897  | 12.266966 | 0.73672  | C | 3.589  | -3.464034 | 0.43272  |
| H | 0.881   | 12.935966 | -1.66928 | C | 3.57   | -2.061034 | 0.40672  |
| H | 0       | 11.988966 | -2.90628 | C | 4.794  | -1.376034 | 0.43272  |
| H | -0.881  | 12.935966 | -1.66928 | C | 7.794  | -1.610034 | 2.07972  |
| H | -1.613  | 8.172966  | 2.28072  | C | 7.232  | 0.179966  | 0.42772  |
| H | -3.398  | 8.171966  | 2.26272  | C | 5.291  | -5.944034 | 2.07972  |
| H | -2.502  | 6.709966  | 2.78972  | C | 3.46   | -6.352034 | 0.42772  |
| H | -3.782  | 5.334966  | 1.14172  | C | 10.088 | -5.824034 | 0.56372  |
| H | -4.673  | 6.769966  | 0.63472  | C | 10.651 | -6.150034 | -1.84828 |
| H | -3.848  | 5.761966  | -0.59228 | C | 10.37  | -1.869034 | -1.67228 |
| H | 1.613   | 8.172966  | 2.28072  | H | 4.802  | -8.004034 | -0.88528 |
| H | 2.502   | 6.709966  | 2.78972  | H | 8.887  | -7.886034 | -2.17928 |
| H | 3.398   | 8.171966  | 2.26272  | H | 9.332  | -0.157034 | -0.88528 |
| H | 3.782   | 5.333966  | 1.14172  | H | 11.273 | -3.753034 | -2.17928 |
| H | 3.848   | 5.762966  | -0.59228 | H | 2.631  | -3.982034 | 0.48472  |
| H | 4.673   | 6.769966  | 0.63572  | H | 4.764  | -0.287034 | 0.48472  |
| H | 4.464   | 10.280966 | -2.17828 | H | 7.884  | -2.690034 | 2.28072  |
| C | -6.804  | -8.046034 | -1.67228 | H | 8.776  | -1.143034 | 2.26272  |
| C | -8.043  | -7.406034 | -1.68028 | H | 7.062  | -1.188034 | 2.78972  |
| C | -8.228  | -6.166034 | -1.05428 | H | 8.2    | 0.661966  | 0.63472  |
| C | -7.118  | -5.527034 | -0.45128 | H | 6.914  | 0.450966  | -0.59228 |
| C | -5.898  | -6.234034 | -0.31728 | H | 6.511  | 0.607966  | 1.14172  |
| C | -5.754  | -7.473034 | -0.95628 | H | 6.272  | -5.483034 | 2.28072  |
| N | -7.223  | -4.170034 | 0.00972  | H | 4.56   | -5.522034 | 2.78972  |
| C | -6.012  | -3.471034 | 0.27272  | H | 5.378  | -7.029034 | 2.26272  |
| C | -4.786  | -4.178034 | 0.40172  | H | 3.526  | -7.432034 | 0.63572  |
| C | -4.83   | -5.683034 | 0.61572  | H | 2.729  | -5.943034 | 1.14172  |
| C | -9.61   | -5.548034 | -0.89228 | H | 3.067  | -6.213034 | -0.59228 |
| C | -9.454  | -4.043034 | -1.05428 | H | 9.379  | -5.415034 | 1.30172  |
| C | -8.346  | -3.400034 | -0.45128 | H | 10.175 | -6.910034 | 0.73672  |
| C | -8.348  | -1.990034 | -0.31628 | H | 11.072 | -5.356034 | 0.73672  |
| C | -7.336  | -1.341034 | 0.61572  | H | 10.762 | -7.231034 | -1.66928 |
| C | -6.011  | -2.056034 | 0.40172  | H | 10.383 | -5.995034 | -2.90628 |
| C | -4.794  | -1.376034 | 0.43272  | H | 11.643 | -5.705034 | -1.66928 |
| C | -3.589  | -3.464034 | 0.43272  | H | 11.136 | -1.275034 | -2.17828 |
| C | -10.435 | -3.262034 | -1.68028 | H | -6.672 | -9.006034 | -2.17828 |
| C | -10.37  | -1.869034 | -1.67128 | H | 6.672  | -9.006034 | -2.17828 |
| C | -9.349  | -1.246034 | -0.95528 | C | 0      | 2.648966  | 0.41072  |
| C | -7.794  | -1.610034 | 2.07972  | C | 1.222  | 0.704966  | 0.41072  |
| C | -7.231  | 0.179966  | 0.42772  | C | -1.222 | 0.704966  | 0.41072  |
| C | -10.088 | -5.824034 | 0.56372  | C | 0      | -1.411034 | 0.41072  |
| C | -10.651 | -6.150034 | -1.84828 | C | 2.294  | -1.325034 | 0.41072  |
| C | -5.291  | -5.945034 | 2.07972  | C | -2.294 | -1.325034 | 0.41072  |
| C | -3.46   | -6.352034 | 0.42772  | N | 0      | -0.000034 | 0.40872  |



|   |         |           |          |   |        |           |         |
|---|---------|-----------|----------|---|--------|-----------|---------|
| C | -3.57   | -2.061034 | 0.40672  | N | 1.207  | 2.041966  | 0.41272 |
| H | -8.887  | -7.886034 | -2.17928 | N | -1.207 | 2.041966  | 0.41272 |
| H | -4.802  | -8.004034 | -0.88528 | N | 1.165  | -2.066034 | 0.41272 |
| H | -4.764  | -0.287034 | 0.48472  | N | 2.372  | 0.024966  | 0.41272 |
| H | -2.631  | -3.982034 | 0.48472  | N | -1.164 | -2.066034 | 0.41272 |
| H | -11.273 | -3.753034 | -2.17928 | N | -2.372 | 0.024966  | 0.41272 |
| H | -11.136 | -1.275034 | -2.17828 |   |        |           |         |

**Table S12.**  $S_{1,\min}$  Cartesian coordinates of HAP-3HMAT.

| Atom | X (Å)     | Y (Å)     | Z (Å)     | Atom | X (Å)      | Y (Å)     | Z (Å)     |
|------|-----------|-----------|-----------|------|------------|-----------|-----------|
| C    | -0.000624 | 4.12069   | 0.81605   | H    | -9.196102  | -0.077291 | -0.889937 |
| C    | -1.206481 | 4.840558  | 0.765051  | H    | -8.03537   | -2.786744 | 2.251063  |
| C    | -1.225069 | 6.221994  | 0.583051  | H    | -7.267044  | -1.318609 | 2.916061  |
| C    | -0.000582 | 6.913105  | 0.383049  | H    | -8.927074  | -1.24043  | 2.238063  |
| C    | 1.223638  | 6.22345   | 0.588048  | H    | -6.577395  | 0.568209  | 1.43006   |
| C    | 1.205146  | 4.840256  | 0.770048  | H    | -6.819407  | 0.509454  | -0.33994  |
| N    | -0.00075  | 8.278614  | -0.026951 | H    | -8.212638  | 0.651447  | 0.774062  |
| C    | 1.228204  | 8.811845  | -0.546953 | H    | -9.428482  | -5.447463 | 0.991065  |
| C    | 2.449926  | 8.126521  | -0.334954 | H    | -11.063023 | -5.353431 | 0.278067  |
| C    | 2.503352  | 7.032985  | 0.721046  | H    | -10.164591 | -6.907409 | 0.274067  |
| C    | -2.506566 | 7.030994  | 0.711052  | H    | -10.530761 | -7.093169 | -2.188933 |
| C    | -2.448487 | 8.125341  | -0.345948 | H    | -11.411342 | -5.568144 | -2.184932 |
| C    | -1.226333 | 8.81049   | -0.55195  | H    | -10.043713 | -5.791853 | -3.315934 |
| C    | -1.223533 | 10.020717 | -1.28895  | H    | -6.425573  | -5.574309 | 2.244061  |
| C    | 0.001994  | 10.920212 | -1.218952 | H    | -5.530404  | -7.118626 | 2.224061  |
| C    | 1.227905  | 10.02144  | -1.282953 | H    | -4.767806  | -5.644559 | 2.906059  |
| C    | 2.395532  | 10.410796 | -1.952955 | H    | -3.537874  | -7.439102 | 0.754058  |
| C    | 3.595838  | 8.54953   | -1.020956 | H    | -2.968143  | -6.157059 | -0.356943 |
| C    | -3.592271 | 8.547396  | -1.036947 | H    | -2.792571  | -5.983089 | 1.414057  |
| C    | -3.562172 | 9.660238  | -1.876947 | C    | 6.583973   | -7.922303 | -1.860955 |
| C    | -2.389012 | 10.408328 | -1.962949 | C    | 5.606954   | -7.389076 | -1.020953 |
| C    | -0.001765 | 11.623356 | 0.170048  | C    | 5.813075   | -6.185118 | -0.334954 |
| C    | 0.003139  | 12.015204 | -2.296952 | C    | 7.017245   | -5.468783 | -0.546956 |
| C    | -2.5038   | 7.714814  | 2.110052  | C    | 8.064378   | -6.073551 | -1.282957 |
| C    | -3.771799 | 6.16632   | 0.614054  | C    | 7.818079   | -7.2799   | -1.952956 |
| C    | 2.494458  | 7.717008  | 2.120046  | N    | 7.169286   | -4.139018 | -0.026956 |
| C    | 3.770679  | 6.168486  | 0.630045  | C    | 8.243277   | -3.343069 | -0.551958 |
| C    | 3.569001  | 9.663017  | -1.860956 | C    | 9.289677   | -3.950568 | -1.288959 |
| H    | -2.138405 | 4.284681  | 0.883053  | C    | 9.456624   | -5.461162 | -1.218959 |
| H    | 2.136355  | 4.286382  | 0.890047  | C    | 4.838914   | -5.684872 | 0.721047  |
| H    | 2.390578  | 11.322191 | -2.552955 | C    | 4.777509   | -4.171134 | 0.588047  |
| H    | 4.531112  | 8.002619  | -0.889957 | C    | 5.987143   | -3.456267 | 0.383045  |
| H    | -4.527325 | 7.998949  | -0.908945 | C    | 6.001575   | -2.050017 | 0.583044  |
| H    | -4.459048 | 9.968408  | -2.420946 | C    | 7.342601   | -1.344803 | 0.711042  |
| H    | -2.381939 | 11.320886 | -2.562949 | C    | 8.260707   | -1.942017 | -0.345959 |
| H    | -0.00284  | 10.888565 | 0.991048  | C    | 9.197704   | -1.162732 | -1.03696  |
| H    | 0.895493  | 12.257363 | 0.278047  | C    | 10.208425  | -3.135633 | -1.962961 |
| H    | -0.899177 | 12.256746 | 0.274049  | C    | 3.58944    | -3.464096 | 0.770048  |
| H    | 0.88321   | 12.667004 | -2.184954 | C    | 3.569025   | -2.059472 | 0.816047  |
| H    | 0.005787  | 11.594237 | -3.315952 | C    | 4.794777   | -1.374558 | 0.765046  |
| H    | -0.877845 | 12.666147 | -2.188951 | C    | 7.933375   | -1.68866  | 2.110042  |

|   |            |           |           |   |           |           |           |
|---|------------|-----------|-----------|---|-----------|-----------|-----------|
| H | -1.614736  | 8.351021  | 2.244051  | C | 7.226563  | 0.183604  | 0.614042  |
| H | -3.400345  | 8.348703  | 2.224053  | C | 5.435353  | -6.018536 | 2.120046  |
| H | -2.504514  | 6.951372  | 2.906053  | C | 3.457419  | -6.349934 | 0.630049  |
| H | -3.785937  | 5.410143  | 1.414055  | C | 10.067885 | -5.81052  | 0.17004   |
| H | -4.673611  | 6.78332   | 0.754055  | C | 10.40369  | -6.010508 | -2.29696  |
| H | -3.848525  | 5.648789  | -0.356945 | C | 10.147629 | -1.74506  | -1.876961 |
| H | 1.604109   | 8.352161  | 2.251047  | H | 4.664906  | -7.925395 | -0.889952 |
| H | 2.492012   | 6.952566  | 2.916046  | H | 8.610584  | -7.73137  | -2.552957 |
| H | 3.389484   | 8.350881  | 2.238045  | H | 9.191452  | -0.078933 | -0.90896  |
| H | 3.780728   | 5.412404  | 1.430045  | H | 10.995264 | -3.597297 | -2.562962 |
| H | 3.850733   | 5.651324  | -0.339955 | H | 2.643396  | -3.993485 | 0.890049  |
| H | 4.670234   | 6.786501  | 0.774043  | H | 4.779596  | -0.29129  | 0.883045  |
| H | 4.467662   | 9.972303  | -2.401957 | H | 8.039871  | -2.778142 | 2.244042  |
| C | -6.584678  | -7.914746 | -1.876938 | H | 8.930177  | -1.229275 | 2.22404   |
| C | -7.819001  | -7.273629 | -1.962936 | H | 7.27225   | -1.306876 | 2.906043  |
| C | -8.066229  | -6.070216 | -1.288936 | H | 8.211408  | 0.655717  | 0.754041  |
| C | -7.017027  | -5.467488 | -0.551938 | H | 6.815719  | 0.507704  | -0.356957 |
| C | -5.812302  | -6.183391 | -0.345939 | H | 6.577933  | 0.573747  | 1.414043  |
| C | -5.606884  | -7.384364 | -1.036939 | H | 6.431189  | -5.565481 | 2.251045  |
| N | -7.169117  | -4.138796 | -0.026938 | H | 4.774963  | -5.634021 | 2.916047  |
| C | -5.987507  | -3.457404 | 0.38306   | H | 5.537518  | -7.110516 | 2.238047  |
| C | -4.775718  | -4.171543 | 0.583059  | H | 3.541461  | -7.438513 | 0.774049  |
| C | -4.836113  | -5.686257 | 0.711059  | H | 2.796592  | -5.980677 | 1.43005   |
| C | -9.457837  | -5.458618 | -1.218935 | H | 2.968592  | -6.160845 | -0.33995  |
| C | -9.292369  | -3.947956 | -1.282935 | H | 9.431245  | -5.441167 | 0.991041  |
| C | -8.244665  | -3.342629 | -0.546937 | H | 10.167451 | -6.903998 | 0.278041  |
| C | -8.263082  | -1.94147  | -0.334937 | H | 11.064555 | -5.348903 | 0.274039  |
| C | -7.342344  | -1.348178 | 0.721061  | H | 10.528043 | -7.098928 | -2.18496  |
| C | -6.000359  | -2.051882 | 0.58806   | H | 10.037832 | -5.802453 | -3.31596  |
| C | -4.794664  | -1.376225 | 0.770058  | H | 11.408517 | -5.573046 | -2.188961 |
| C | -3.588007  | -3.4647   | 0.765057  | H | 10.862352 | -1.122812 | -2.420962 |
| C | -10.213699 | -3.130964 | -1.952935 | H | -6.403394 | -8.845665 | -2.420938 |
| C | -10.152196 | -1.740282 | -1.860935 | H | 6.401593  | -8.85515  | -2.401954 |
| C | -9.202377  | -1.161388 | -1.020936 | C | -0.000107 | 2.666497  | 0.955051  |
| C | -7.930383  | -1.69767  | 2.120062  | C | 1.213137  | 0.70072   | 0.95205   |
| C | -7.227677  | 0.180517  | 0.630061  | C | -1.212749 | 0.699725  | 0.952053  |
| C | -10.0657   | -5.813769 | 0.170066  | C | 0.000402  | -1.400011 | 0.952052  |
| C | -10.406918 | -6.004764 | -2.296933 | C | 2.309433  | -1.332498 | 0.955049  |
| C | -5.429647  | -6.026219 | 2.11006   | C | -2.309402 | -1.334065 | 0.955055  |
| C | -3.453976  | -6.34949  | 0.614058  | N | -0.000026 | -0.000022 | 0.648051  |
| C | -3.568478  | -2.061283 | 0.816057  | N | 1.193539  | 2.023855  | 1.079049  |
| H | -8.612549  | -7.723159 | -2.562935 | N | -1.194768 | 2.023753  | 1.079052  |
| H | -4.663712  | -7.92095  | -0.90894  | N | 1.156601  | -2.045777 | 1.079051  |
| H | -4.779828  | -0.292963 | 0.890058  | N | 2.35024   | 0.022009  | 1.079048  |
| H | -2.641269  | -3.993457 | 0.883056  | N | -1.155548 | -2.045827 | 1.079054  |
| H | -11.001252 | -3.590889 | -2.552933 | N | -2.350216 | 0.021857  | 1.079054  |
| H | -10.869843 | -1.116355 | -2.401934 |   |           |           |           |

**Table S13.** T<sub>1,min</sub> Cartesian coordinates of HAP-3HMAT.

| Atom | X (Å)     | Y (Å)     | Z (Å)     | Atom | X (Å)     | Y (Å)     | Z (Å)      |
|------|-----------|-----------|-----------|------|-----------|-----------|------------|
| C    | -0.38981  | -2.047727 | 3.570893  | H    | 0.738686  | 8.237868  | 4.571114   |
| C    | -0.437921 | -1.375305 | 4.799204  | H    | -2.293415 | 8.179092  | 1.611931   |
| C    | -0.407674 | -2.065058 | 6.012392  | H    | -2.792957 | 6.720666  | 2.513774   |
| C    | -0.26404  | -3.476865 | 6.004238  | H    | -2.268713 | 8.19118   | 3.398834   |
| C    | -0.359203 | -4.173508 | 4.772049  | H    | -1.139466 | 5.342553  | 3.784966   |
| C    | -0.390935 | -3.448697 | 3.579101  | H    | 0.58709   | 5.78603   | 3.86719    |
| N    | -0.018145 | -4.18662  | 7.220437  | H    | -0.660692 | 6.778416  | 4.68556    |
| C    | 0.466626  | -5.533259 | 7.110864  | H    | -1.197453 | 10.983785 | 0          |
| C    | 0.372422  | -6.229901 | 5.880806  | H    | -0.532231 | 12.37764  | 0.897186   |
| C    | -0.54453  | -5.683352 | 4.796611  | H    | -0.532231 | 12.37764  | -0.897186  |
| C    | -0.645876 | -1.361876 | 7.340324  | H    | 1.917169  | 12.884445 | -0.877249  |
| C    | 0.273655  | -2.011936 | 8.363399  | H    | 1.917169  | 12.884445 | 0.877249   |
| C    | 0.417228  | -3.421518 | 8.35341   | H    | 3.085021  | 11.85091  | 0          |
| C    | 1.000842  | -4.066901 | 9.471462  | H    | -2.293415 | 8.179092  | -1.611931  |
| C    | 0.842908  | -5.573777 | 9.611293  | H    | -2.268713 | 8.19118   | -3.398834  |
| C    | 1.050314  | -6.176778 | 8.229737  | H    | -2.792957 | 6.720666  | -2.513774  |
| C    | 1.700442  | -7.404867 | 8.047618  | H    | -0.660692 | 6.778416  | -4.68556   |
| C    | 1.035086  | -7.456502 | 5.740483  | H    | 0.58709   | 5.78603   | -3.86719   |
| C    | 0.889901  | -1.271578 | 9.380967  | H    | -1.139466 | 5.342553  | -3.784966  |
| C    | 1.589907  | -1.896521 | 10.412508 | C    | 1.589907  | -1.896521 | -10.412508 |
| C    | 1.604075  | -3.289673 | 10.46945  | C    | 0.889901  | -1.271578 | -9.380967  |
| C    | -0.624578 | -5.863003 | 10.044464 | C    | 0.273655  | -2.011936 | -8.363399  |
| C    | 1.771897  | -6.178196 | 10.67541  | C    | 0.417228  | -3.421518 | -8.35341   |
| C    | -2.115264 | -1.640795 | 7.773303  | C    | 1.000842  | -4.066901 | -9.471462  |
| C    | -0.464381 | 0.16098   | 7.250013  | C    | 1.604075  | -3.289673 | -10.46945  |
| C    | -2.013546 | -5.978512 | 5.22008   | N    | -0.018145 | -4.18662  | -7.220437  |
| C    | -0.31107  | -6.335694 | 3.425385  | C    | 0.466626  | -5.533259 | -7.110864  |
| C    | 1.733688  | -8.030681 | 6.802029  | C    | 1.050314  | -6.176778 | -8.229737  |
| H    | -0.505556 | -0.286931 | 4.774336  | C    | 0.842908  | -5.573777 | -9.611293  |
| H    | -0.422111 | -3.957056 | 2.614652  | C    | -0.645876 | -1.361876 | -7.340324  |
| H    | 2.184439  | -7.886462 | 8.899514  | C    | -0.407674 | -2.065058 | -6.012392  |
| H    | 0.997191  | -7.977438 | 4.78188   | C    | -0.26404  | -3.476865 | -6.004238  |
| H    | 0.813795  | -0.182553 | 9.37031   | C    | -0.359203 | -4.173508 | -4.772049  |
| H    | 2.078187  | -1.303896 | 11.191356 | C    | -0.54453  | -5.683352 | -4.796611  |
| H    | 2.088524  | -3.784027 | 11.313744 | C    | 0.372422  | -6.229901 | -5.880806  |
| H    | -1.343863 | -5.452385 | 9.317834  | C    | 1.035086  | -7.456502 | -5.740483  |
| H    | -0.792279 | -6.951123 | 10.116969 | C    | 1.700442  | -7.404867 | -8.047618  |
| H    | -0.828654 | -5.404747 | 11.027227 | C    | -0.437921 | -1.375305 | -4.799204  |
| H    | 1.597121  | -7.26141  | 10.770939 | C    | -0.38981  | -2.047727 | -3.570893  |
| H    | 2.836277  | -6.014287 | 10.439248 | C    | -0.390935 | -3.448697 | -3.579101  |
| H    | 1.561426  | -5.742831 | 11.664991 | C    | -2.013546 | -5.978512 | -5.22008   |
| H    | -2.310749 | -2.722329 | 7.853425  | C    | -0.31107  | -6.335694 | -3.425385  |
| H    | -2.31674  | -1.181225 | 8.756066  | C    | -2.115264 | -1.640795 | -7.773303  |
| H    | -2.814992 | -1.218819 | 7.032075  | C    | -0.464381 | 0.16098   | -7.250013  |
| H    | -1.168245 | 0.59044   | 6.52053   | C    | -0.624578 | -5.863003 | -10.044464 |
| H    | -0.689013 | 0.635459  | 8.218577  | C    | 1.771897  | -6.178196 | -10.67541  |
| H    | 0.559171  | 0.438965  | 6.9497    | C    | 1.733688  | -8.030681 | -6.802029  |
| H    | -2.245766 | -5.531533 | 6.200283  | H    | 0.813795  | -0.182553 | -9.37031   |
| H    | -2.713014 | -5.560371 | 4.476504  | H    | 2.088524  | -3.784027 | -11.313744 |
| H    | -2.177905 | -7.067295 | 5.290902  | H    | 0.997191  | -7.977438 | -4.78188   |

|   |           |           |           |   |           |           |            |
|---|-----------|-----------|-----------|---|-----------|-----------|------------|
| H | -1.014228 | -5.931876 | 2.680858  | H | 2.184439  | -7.886462 | -8.899514  |
| H | 0.715013  | -6.171854 | 3.057582  | H | -0.505556 | -0.286931 | -4.774336  |
| H | -0.498506 | -7.420064 | 3.475832  | H | -0.422111 | -3.957056 | -2.614652  |
| H | 2.258199  | -8.981551 | 6.672084  | H | -2.245766 | -5.531533 | -6.200283  |
| C | 1.57316   | 9.971518  | -3.613474 | H | -2.177905 | -7.067295 | -5.290902  |
| C | 1.654983  | 10.699103 | -2.426167 | H | -2.713014 | -5.560371 | -4.476504  |
| C | 1.102804  | 10.216467 | -1.234702 | H | -0.498506 | -7.420064 | -3.475832  |
| C | 0.495792  | 8.9316    | -1.232387 | H | 0.715013  | -6.171854 | -3.057582  |
| C | 0.294856  | 8.246286  | -2.462777 | H | -1.014228 | -5.931876 | -2.680858  |
| C | 0.857732  | 8.775139  | -3.62946  | H | -2.310749 | -2.722329 | -7.853425  |
| N | 0.116591  | 8.312073  | 0         | H | -2.814992 | -1.218819 | -7.032075  |
| C | -0.276681 | 6.957681  | 0         | H | -2.31674  | -1.181225 | -8.756066  |
| C | -0.424146 | 6.236368  | -1.241542 | H | -0.689013 | 0.635459  | -8.218577  |
| C | -0.620219 | 7.033917  | -2.514733 | H | -1.168245 | 0.59044   | -6.52053   |
| C | 1.01387   | 11.097952 | 0         | H | 0.559171  | 0.438965  | -6.9497    |
| C | 1.102804  | 10.216467 | 1.234702  | H | -1.343863 | -5.452385 | -9.317834  |
| C | 0.495792  | 8.9316    | 1.232387  | H | -0.828654 | -5.404747 | -11.027227 |
| C | 0.294856  | 8.246286  | 2.462777  | H | -0.792279 | -6.951123 | -10.116969 |
| C | -0.620219 | 7.033917  | 2.514733  | H | 1.561426  | -5.742831 | -11.664991 |
| C | -0.424146 | 6.236368  | 1.241542  | H | 2.836277  | -6.014287 | -10.439248 |
| C | -0.489617 | 4.861649  | 1.2239    | H | 1.597121  | -7.26141  | -10.770939 |
| C | -0.489617 | 4.861649  | -1.2239   | H | 2.258199  | -8.981551 | -6.672084  |
| C | 1.654983  | 10.699103 | 2.426167  | H | 2.03269   | 10.353955 | -4.528823  |
| C | 1.57316   | 9.971518  | 3.613474  | H | 2.078187  | -1.303896 | -11.191356 |
| C | 0.857732  | 8.775139  | 3.62946   | C | -0.398117 | -1.297512 | 2.293186   |
| C | -2.089343 | 7.568779  | 2.506486  | C | -0.39076  | -1.38278  | 0          |
| C | -0.435423 | 6.18753   | 3.784214  | C | -0.419737 | 0.739544  | 1.231049   |
| C | -0.404857 | 11.749248 | 0         | C | -0.419737 | 0.739544  | -1.231049  |
| C | 2.051792  | 12.233982 | 0         | C | -0.398117 | -1.297512 | -2.293186  |
| C | -2.089343 | 7.568779  | -2.506486 | C | -0.432822 | 2.679851  | 0          |
| C | -0.435423 | 6.18753   | -3.784214 | N | -0.40486  | 0.02384   | 0          |
| C | -0.447764 | 4.123036  | 0         | N | -0.385147 | -2.043021 | 1.162543   |
| H | 2.156795  | 11.667452 | -2.432554 | N | -0.417942 | 0.04241   | 2.382125   |
| H | 0.738686  | 8.237868  | -4.571114 | N | -0.417942 | 0.04241   | -2.382125  |
| H | -0.576672 | 4.279417  | 2.141085  | N | -0.385147 | -2.043021 | -1.162543  |
| H | -0.576672 | 4.279417  | -2.141085 | N | -0.433702 | 2.06202   | -1.222434  |
| H | 2.156795  | 11.667452 | 2.432554  | N | -0.433702 | 2.06202   | 1.222434   |
| H | 2.03269   | 10.353955 | 4.528823  |   |           |           |            |

### C. Electronic and vertical excitation energies

**Table S14.** Electronic energy (EE) and first 25 singlet and 25 triplet vertical excitation energies of HAP-3MeOCz at the FC geometry.

| State           | Symmetry | Energy                 | State           | Symmetry | Energy    |
|-----------------|----------|------------------------|-----------------|----------|-----------|
| EE              | -        | -3539.4477088 hartrees |                 |          |           |
| T <sub>1</sub>  | E        | 2.2060 eV              | S <sub>8</sub>  | A        | 3.2727 eV |
| T <sub>2</sub>  | E        | 2.2060 eV              | S <sub>9</sub>  | E        | 3.2844 eV |
| T <sub>3</sub>  | A        | 2.2088 eV              | S <sub>10</sub> | E        | 3.2844 eV |
| S <sub>1</sub>  | E        | 2.4276 eV              | S <sub>11</sub> | E        | 3.4030 eV |
| S <sub>2</sub>  | E        | 2.4276 eV              | S <sub>12</sub> | E        | 3.4030 eV |
| T <sub>4</sub>  | A        | 2.4947 eV              | S <sub>13</sub> | A        | 3.4238 eV |
| S <sub>3</sub>  | A        | 2.5004 eV              | T <sub>19</sub> | A        | 3.4442 eV |
| S <sub>4</sub>  | A        | 2.6846 eV              | T <sub>20</sub> | E        | 3.4478 eV |
| T <sub>5</sub>  | E        | 2.9207 eV              | T <sub>21</sub> | E        | 3.4478 eV |
| T <sub>6</sub>  | E        | 2.9207 eV              | S <sub>14</sub> | A        | 3.4699 eV |
| T <sub>7</sub>  | A        | 2.9250 eV              | S <sub>15</sub> | E        | 3.4702 eV |
| T <sub>8</sub>  | A        | 3.0005 eV              | S <sub>16</sub> | E        | 3.4702 eV |
| T <sub>9</sub>  | E        | 3.0162 eV              | T <sub>22</sub> | A        | 3.5036 eV |
| T <sub>10</sub> | E        | 3.0162 eV              | T <sub>23</sub> | E        | 3.5042 eV |
| T <sub>11</sub> | A        | 3.0636 eV              | T <sub>24</sub> | E        | 3.5042 eV |
| S <sub>5</sub>  | A        | 3.1230 eV              | S <sub>17</sub> | E        | 3.5286 eV |
| T <sub>12</sub> | E        | 3.1301 eV              | S <sub>18</sub> | E        | 3.5286 eV |
| T <sub>13</sub> | E        | 3.1301 eV              | S <sub>19</sub> | A        | 3.5908 eV |
| T <sub>14</sub> | A        | 3.2026 eV              | T <sub>25</sub> | A        | 3.5961 eV |
| S <sub>6</sub>  | E        | 3.2095 eV              | S <sub>20</sub> | E        | 3.8158 eV |
| S <sub>7</sub>  | E        | 3.2095 eV              | S <sub>21</sub> | E        | 3.8158 eV |
| T <sub>15</sub> | E        | 3.2225 eV              | S <sub>22</sub> | A        | 3.8312 eV |
| T <sub>16</sub> | E        | 3.2225 eV              | S <sub>23</sub> | E        | 3.9720 eV |
| T <sub>17</sub> | E        | 3.2460 eV              | S <sub>24</sub> | E        | 3.9720 eV |
| T <sub>18</sub> | E        | 3.2460 eV              | S <sub>25</sub> | A        | 3.9828 eV |

**Table S15.** Electronic energy (EE) and first 25 singlet and 25 triplet vertical excitation energies of HAP-3MeOCz at the S<sub>1,min</sub> geometry.

| State          | Symmetry | Energy                 | State           | Symmetry | Energy    |
|----------------|----------|------------------------|-----------------|----------|-----------|
| EE             | -        | -3539.4363511 hartrees |                 |          |           |
| T <sub>1</sub> | A        | 1.8313 eV              | S <sub>11</sub> | A        | 3.1893 eV |
| S <sub>1</sub> | A        | 1.8406 eV              | T <sub>16</sub> | A        | 3.2087 eV |
| T <sub>2</sub> | A        | 2.1982 eV              | S <sub>12</sub> | A        | 3.2226 eV |
| T <sub>3</sub> | A        | 2.2162 eV              | T <sub>17</sub> | A        | 3.2298 eV |
| S <sub>2</sub> | A        | 2.3351 eV              | T <sub>18</sub> | A        | 3.2589 eV |
| S <sub>3</sub> | A        | 2.3989 eV              | S <sub>13</sub> | A        | 3.2818 eV |
| T <sub>4</sub> | A        | 2.4257 eV              | T <sub>19</sub> | A        | 3.3115 eV |
| S <sub>4</sub> | A        | 2.6204 eV              | T <sub>20</sub> | A        | 3.3378 eV |
| T <sub>5</sub> | A        | 2.6498 eV              | T <sub>21</sub> | A        | 3.3467 eV |
| T <sub>6</sub> | A        | 2.7518 eV              | S <sub>14</sub> | A        | 3.3782 eV |
| S <sub>5</sub> | A        | 2.7619 eV              | S <sub>15</sub> | A        | 3.4031 eV |
| T <sub>7</sub> | A        | 2.8513 eV              | T <sub>22</sub> | A        | 3.4236 eV |
| T <sub>8</sub> | A        | 2.8930 eV              | T <sub>23</sub> | A        | 3.4312 eV |

|                 |   |           |                 |   |           |
|-----------------|---|-----------|-----------------|---|-----------|
| T <sub>9</sub>  | A | 2.9574 eV | S <sub>16</sub> | A | 3.4521 eV |
| T <sub>10</sub> | A | 2.9807 eV | T <sub>24</sub> | A | 3.4601 eV |
| T <sub>11</sub> | A | 3.0110 eV | S <sub>17</sub> | A | 3.4628 eV |
| T <sub>12</sub> | A | 3.0168 eV | S <sub>18</sub> | A | 3.4752 eV |
| S <sub>6</sub>  | A | 3.0186 eV | T <sub>25</sub> | A | 3.4807 eV |
| S <sub>7</sub>  | A | 3.0335 eV | S <sub>19</sub> | A | 3.5076 eV |
| T <sub>13</sub> | A | 3.0595 eV | S <sub>20</sub> | A | 3.5528 eV |
| S <sub>8</sub>  | A | 3.0883 eV | S <sub>21</sub> | A | 3.7368 eV |
| T <sub>14</sub> | A | 3.0915 eV | S <sub>22</sub> | A | 3.7643 eV |
| T <sub>15</sub> | A | 3.1108 eV | S <sub>23</sub> | A | 3.8221 eV |
| S <sub>9</sub>  | A | 3.1308 eV | S <sub>24</sub> | A | 3.8408 eV |
| S <sub>10</sub> | A | 3.1489 eV | S <sub>25</sub> | A | 3.9895 eV |

**Table S16.** Electronic energy (EE) and first 25 singlet and 25 triplet vertical excitation energies of HAP-3MeOCz at the T<sub>1,min</sub> geometry.

| State           | Symmetry | Energy                 | State           | Symmetry | Energy    |
|-----------------|----------|------------------------|-----------------|----------|-----------|
| EE              | -        | -3539.4383488 hartrees |                 |          |           |
| T <sub>1</sub>  | A        | 1.6476 eV              | T <sub>17</sub> | A        | 3.2877 eV |
| S <sub>1</sub>  | A        | 2.1999 eV              | S <sub>10</sub> | A        | 3.2969 eV |
| T <sub>2</sub>  | A        | 2.3024 eV              | S <sub>11</sub> | A        | 3.3185 eV |
| T <sub>3</sub>  | A        | 2.3359 eV              | T <sub>18</sub> | A        | 3.3194 eV |
| T <sub>4</sub>  | A        | 2.4541 eV              | S <sub>12</sub> | A        | 3.3247 eV |
| S <sub>2</sub>  | A        | 2.4637 eV              | S <sub>13</sub> | A        | 3.3470 eV |
| S <sub>3</sub>  | A        | 2.4930 eV              | T <sub>19</sub> | A        | 3.4080 eV |
| T <sub>5</sub>  | A        | 2.6329 eV              | S <sub>14</sub> | A        | 3.4302 eV |
| S <sub>4</sub>  | A        | 2.6412 eV              | T <sub>20</sub> | A        | 3.4317 eV |
| T <sub>6</sub>  | A        | 2.8179 eV              | T <sub>21</sub> | A        | 3.4425 eV |
| T <sub>7</sub>  | A        | 2.8507 eV              | T <sub>22</sub> | A        | 3.4463 eV |
| T <sub>8</sub>  | A        | 2.8640 eV              | T <sub>23</sub> | A        | 3.4775 eV |
| T <sub>9</sub>  | A        | 2.8837 eV              | T <sub>24</sub> | A        | 3.4936 eV |
| S <sub>5</sub>  | A        | 2.9467 eV              | S <sub>15</sub> | A        | 3.5068 eV |
| T <sub>10</sub> | A        | 3.0108 eV              | T <sub>25</sub> | A        | 3.5100 eV |
| T <sub>11</sub> | A        | 3.0726 eV              | S <sub>16</sub> | A        | 3.5436 eV |
| S <sub>6</sub>  | A        | 3.0878 eV              | S <sub>17</sub> | A        | 3.5660 eV |
| T <sub>12</sub> | A        | 3.1070 eV              | S <sub>18</sub> | A        | 3.5890 eV |
| T <sub>13</sub> | A        | 3.1397 eV              | S <sub>19</sub> | A        | 3.6251 eV |
| T <sub>14</sub> | A        | 3.1778 eV              | S <sub>20</sub> | A        | 3.7522 eV |
| S <sub>7</sub>  | A        | 3.1797 eV              | S <sub>21</sub> | A        | 3.7807 eV |
| T <sub>15</sub> | A        | 3.1832 eV              | S <sub>22</sub> | A        | 3.8261 eV |
| S <sub>8</sub>  | A        | 3.2399 eV              | S <sub>23</sub> | A        | 3.8677 eV |
| T <sub>16</sub> | A        | 3.2417 eV              | S <sub>24</sub> | A        | 3.9006 eV |
| S <sub>9</sub>  | A        | 3.2576 eV              | S <sub>25</sub> | A        | 3.9776 eV |

**Table S17.** Electronic energy (EE) and first 25 singlet and 25 triplet vertical excitation energies of HAP-3MeOTPA at the FC geometry.

| State          | Symmetry | Energy                 | State           | Symmetry | Energy    |
|----------------|----------|------------------------|-----------------|----------|-----------|
| EE             | -        | -3542.9865401 hartrees |                 |          |           |
| T <sub>1</sub> | E        | 2.3443 eV              | T <sub>19</sub> | A        | 3.6070 eV |

|                 |   |           |                 |   |           |
|-----------------|---|-----------|-----------------|---|-----------|
| T <sub>2</sub>  | E | 2.3443 eV | T <sub>20</sub> | E | 3.6071 eV |
| T <sub>3</sub>  | A | 2.3790 eV | T <sub>21</sub> | E | 3.6071 eV |
| T <sub>4</sub>  | A | 2.6299 eV | T <sub>22</sub> | A | 3.6555 eV |
| S <sub>1</sub>  | E | 2.7758 eV | T <sub>23</sub> | E | 3.6606 eV |
| S <sub>2</sub>  | E | 2.7758 eV | T <sub>24</sub> | E | 3.6606 eV |
| S <sub>3</sub>  | A | 2.7903 eV | S <sub>8</sub>  | A | 3.6654 eV |
| T <sub>5</sub>  | A | 3.0989 eV | S <sub>9</sub>  | A | 3.6654 eV |
| S <sub>4</sub>  | A | 3.1688 eV | S <sub>10</sub> | A | 3.7013 eV |
| T <sub>6</sub>  | E | 3.2210 eV | T <sub>25</sub> | A | 3.7217 eV |
| T <sub>7</sub>  | E | 3.2210 eV | S <sub>11</sub> | E | 3.7267 eV |
| S <sub>5</sub>  | A | 3.2238 eV | S <sub>12</sub> | E | 3.7267 eV |
| T <sub>8</sub>  | E | 3.2428 eV | S <sub>13</sub> | A | 3.7411 eV |
| T <sub>9</sub>  | E | 3.2428 eV | S <sub>14</sub> | A | 3.8435 eV |
| T <sub>10</sub> | A | 3.2509 eV | S <sub>15</sub> | E | 3.8968 eV |
| T <sub>11</sub> | E | 3.2562 eV | S <sub>16</sub> | E | 3.8968 eV |
| T <sub>12</sub> | E | 3.2562 eV | S <sub>17</sub> | E | 4.1032 eV |
| S <sub>6</sub>  | E | 3.3337 eV | S <sub>18</sub> | E | 4.1032 eV |
| S <sub>7</sub>  | E | 3.3337 eV | S <sub>19</sub> | A | 4.1449 eV |
| T <sub>13</sub> | A | 3.4005 eV | S <sub>20</sub> | E | 4.1461 eV |
| T <sub>14</sub> | E | 3.4007 eV | S <sub>21</sub> | E | 4.1461 eV |
| T <sub>15</sub> | E | 3.4007 eV | S <sub>22</sub> | E | 4.1852 eV |
| T <sub>16</sub> | A | 3.4415 eV | S <sub>23</sub> | E | 4.1852 eV |
| T <sub>17</sub> | E | 3.4690 eV | S <sub>24</sub> | A | 4.1914 eV |
| T <sub>18</sub> | E | 3.4690 eV | S <sub>25</sub> | A | 4.2421 eV |

**Table S18.** Electronic energy (EE) and first 25 singlet and 25 triplet vertical excitation energies of HAP-3MeOTPA at the S<sub>1,min</sub> geometry.

| State           | Symmetry | Energy                 | State           | Symmetry | Energy    |
|-----------------|----------|------------------------|-----------------|----------|-----------|
| EE              | -        | -3542.9667997 hartrees |                 |          |           |
| T <sub>1</sub>  | A        | 1.8056 eV              | S <sub>10</sub> | A        | 3.3246 eV |
| S <sub>1</sub>  | A        | 1.8508 eV              | T <sub>17</sub> | A        | 3.3256 eV |
| T <sub>2</sub>  | A        | 2.2182 eV              | S <sub>11</sub> | A        | 3.3444 eV |
| T <sub>3</sub>  | A        | 2.2413 eV              | T <sub>18</sub> | A        | 3.3540 eV |
| T <sub>4</sub>  | A        | 2.4580 eV              | T <sub>19</sub> | A        | 3.3558 eV |
| S <sub>2</sub>  | A        | 2.5285 eV              | T <sub>20</sub> | A        | 3.3602 eV |
| S <sub>3</sub>  | A        | 2.6685 eV              | T <sub>21</sub> | A        | 3.3895 eV |
| S <sub>4</sub>  | A        | 2.7051 eV              | T <sub>22</sub> | A        | 3.4238 eV |
| T <sub>5</sub>  | A        | 2.9400 eV              | S <sub>12</sub> | A        | 3.4887 eV |
| T <sub>6</sub>  | A        | 2.9682 eV              | T <sub>23</sub> | A        | 3.5264 eV |
| T <sub>7</sub>  | A        | 3.0086 eV              | T <sub>24</sub> | A        | 3.5458 eV |
| T <sub>8</sub>  | A        | 3.0218 eV              | T <sub>25</sub> | A        | 3.5837 eV |
| T <sub>9</sub>  | A        | 3.0549 eV              | S <sub>13</sub> | A        | 3.6160 eV |
| S <sub>5</sub>  | A        | 3.0643 eV              | S <sub>14</sub> | A        | 3.6213 eV |
| T <sub>10</sub> | A        | 3.0811 eV              | S <sub>15</sub> | A        | 3.6981 eV |
| S <sub>6</sub>  | A        | 3.1514 eV              | S <sub>16</sub> | A        | 3.7571 eV |
| T <sub>11</sub> | A        | 3.1564 eV              | S <sub>17</sub> | A        | 3.7637 eV |
| T <sub>12</sub> | A        | 3.1818 eV              | S <sub>18</sub> | A        | 3.8850 eV |
| T <sub>13</sub> | A        | 3.1934 eV              | S <sub>19</sub> | A        | 3.9727 eV |
| T <sub>14</sub> | A        | 3.2147 eV              | S <sub>20</sub> | A        | 3.9929 eV |
| T <sub>15</sub> | A        | 3.2276 eV              | S <sub>21</sub> | A        | 4.0239 eV |
| S <sub>7</sub>  | A        | 3.2354 eV              | S <sub>22</sub> | A        | 4.0529 eV |

|                 |   |           |                 |   |           |
|-----------------|---|-----------|-----------------|---|-----------|
| S <sub>8</sub>  | A | 3.2607 eV | S <sub>23</sub> | A | 4.0601 eV |
| T <sub>16</sub> | A | 3.2643 eV | S <sub>24</sub> | A | 4.0842 eV |
| S <sub>9</sub>  | A | 3.3068 eV | S <sub>25</sub> | A | 4.1305 eV |

**Table S19.** Electronic energy (EE) and first 25 singlet and 25 triplet vertical excitation energies of **HAP-3MeOTPA** at the T<sub>1,min</sub> geometry.

| State           | Symmetry | Energy                 | State           | Symmetry | Energy    |
|-----------------|----------|------------------------|-----------------|----------|-----------|
| EE              | -        | -3542.9794545 hartrees |                 |          |           |
| T <sub>1</sub>  | A        | 1.9632 eV              | S <sub>8</sub>  | A        | 3.4241 eV |
| T <sub>2</sub>  | A        | 2.3202 eV              | T <sub>19</sub> | A        | 3.4478 eV |
| T <sub>3</sub>  | A        | 2.3416 eV              | T <sub>20</sub> | A        | 3.4893 eV |
| S <sub>1</sub>  | A        | 2.4581 eV              | S <sub>9</sub>  | A        | 3.5192 eV |
| T <sub>4</sub>  | A        | 2.5601 eV              | S <sub>10</sub> | A        | 3.5585 eV |
| S <sub>2</sub>  | A        | 2.6782 eV              | T <sub>21</sub> | A        | 3.5803 eV |
| S <sub>3</sub>  | A        | 2.7310 eV              | T <sub>22</sub> | A        | 3.5823 eV |
| S <sub>4</sub>  | A        | 2.9594 eV              | S <sub>11</sub> | A        | 3.5849 eV |
| T <sub>5</sub>  | A        | 3.0455 eV              | T <sub>23</sub> | A        | 3.6054 eV |
| T <sub>6</sub>  | A        | 3.1076 eV              | T <sub>24</sub> | A        | 3.6111 eV |
| T <sub>7</sub>  | A        | 3.1436 eV              | T <sub>25</sub> | A        | 3.6215 eV |
| S <sub>5</sub>  | A        | 3.1501 eV              | S <sub>12</sub> | A        | 3.6755 eV |
| T <sub>8</sub>  | A        | 3.1640 eV              | S <sub>13</sub> | A        | 3.6866 eV |
| T <sub>9</sub>  | A        | 3.2013 eV              | S <sub>14</sub> | A        | 3.7890 eV |
| T <sub>10</sub> | A        | 3.2108 eV              | S <sub>15</sub> | A        | 3.8136 eV |
| T <sub>11</sub> | A        | 3.2172 eV              | S <sub>16</sub> | A        | 3.8434 eV |
| T <sub>12</sub> | A        | 3.2255 eV              | S <sub>17</sub> | A        | 3.9948 eV |
| T <sub>13</sub> | A        | 3.2345 eV              | S <sub>18</sub> | A        | 4.0342 eV |
| S <sub>6</sub>  | A        | 3.2474 eV              | S <sub>19</sub> | A        | 4.0779 eV |
| T <sub>14</sub> | A        | 3.2773 eV              | S <sub>20</sub> | A        | 4.1194 eV |
| T <sub>15</sub> | A        | 3.2866 eV              | S <sub>21</sub> | A        | 4.1235 eV |
| S <sub>7</sub>  | A        | 3.3189 eV              | S <sub>22</sub> | A        | 4.1425 eV |
| T <sub>16</sub> | A        | 3.3561 eV              | S <sub>23</sub> | A        | 4.1622 eV |
| T <sub>17</sub> | A        | 3.3563 eV              | S <sub>24</sub> | A        | 4.1679 eV |
| T <sub>18</sub> | A        | 3.3604 eV              | S <sub>25</sub> | A        | 4.1727 eV |

**Table S20.** Electronic energy (EE) and first 25 singlet and 25 triplet vertical excitation energies of **HAP-3Cz** at the FC geometry.

| State          | Symmetry       | Energy                 | State           | Symmetry       | Energy    |
|----------------|----------------|------------------------|-----------------|----------------|-----------|
| EE             | -              | -2853.0088576 hartrees |                 |                |           |
| T <sub>1</sub> | A <sub>2</sub> | 2.5870 eV              | T <sub>19</sub> | A <sub>2</sub> | 3.6905 eV |
| T <sub>2</sub> | E              | 2.6845 eV              | T <sub>20</sub> | E              | 3.6990 eV |
| T <sub>3</sub> | E              | 2.6845 eV              | T <sub>21</sub> | E              | 3.6990 eV |
| T <sub>4</sub> | A <sub>1</sub> | 2.7040 eV              | S <sub>8</sub>  | E              | 3.7125 eV |
| S <sub>1</sub> | A <sub>2</sub> | 2.7646 eV              | S <sub>9</sub>  | A <sub>2</sub> | 3.7125 eV |
| S <sub>2</sub> | E              | 2.9808 eV              | S <sub>10</sub> | E              | 3.7125 eV |
| S <sub>3</sub> | E              | 2.9808 eV              | T <sub>22</sub> | E              | 3.7207 eV |
| T <sub>5</sub> | A <sub>1</sub> | 3.0878 eV              | T <sub>23</sub> | E              | 3.7207 eV |
| S <sub>4</sub> | A <sub>1</sub> | 3.1444 eV              | T <sub>24</sub> | A <sub>2</sub> | 3.7224 eV |
| T <sub>6</sub> | E              | 3.2028 eV              | T <sub>25</sub> | E              | 3.8238 eV |



|                 |   |           |                 |                |           |
|-----------------|---|-----------|-----------------|----------------|-----------|
| T <sub>7</sub>  | E | 3.2028 eV | S <sub>11</sub> | E              | 3.9538 eV |
| S <sub>5</sub>  | E | 3.2427 eV | S <sub>12</sub> | E              | 3.9538 eV |
| T <sub>8</sub>  | E | 3.2538 eV | S <sub>13</sub> | -              | 3.9816 e  |
| T <sub>9</sub>  | E | 3.2538 eV | S <sub>14</sub> | -              | 4.0951 e  |
| S <sub>6</sub>  | E | 3.3274 eV | S <sub>15</sub> | E              | 4.1117 eV |
| S <sub>7</sub>  | E | 3.3274 eV | S <sub>16</sub> | E              | 4.1117 eV |
| T <sub>10</sub> | E | 3.4244 eV | S <sub>17</sub> | E              | 4.1214 eV |
| T <sub>11</sub> | E | 3.4244 eV | S <sub>18</sub> | E              | 4.1214 eV |
| T <sub>12</sub> | E | 3.4244 e  | S <sub>19</sub> | -              | 4.1225 e  |
| T <sub>13</sub> | E | 3.4485 e  | S <sub>20</sub> | E              | 4.1616 eV |
| T <sub>14</sub> | E | 3.4485 eV | S <sub>21</sub> | E              | 4.1616 eV |
| T <sub>15</sub> | E | 3.4485 eV | S <sub>22</sub> | A <sub>2</sub> | 4.2429 eV |
| T <sub>16</sub> | E | 3.6881 eV | S <sub>23</sub> | E              | 4.2579 eV |
| T <sub>17</sub> | E | 3.6899 eV | S <sub>24</sub> | E              | 4.2579 eV |
| T <sub>18</sub> | E | 3.6899 eV | S <sub>25</sub> | E              | 4.2994 eV |

**Table S21.** Electronic energy (EE) and first 25 singlet and 25 triplet vertical excitation energies of **HAP-3Cz** at the S<sub>1,min</sub> geometry.

| State           | Symmetry | Energy                 | State           | Symmetry | Energy    |
|-----------------|----------|------------------------|-----------------|----------|-----------|
| EE              | -        | -2852.9914767 hartrees |                 |          |           |
| T <sub>1</sub>  | A        | 2.0263 eV              | S <sub>8</sub>  | E        | 3.5417 eV |
| S <sub>1</sub>  | A        | 2.1246 eV              | S <sub>9</sub>  | E        | 3.5417 eV |
| T <sub>2</sub>  | E        | 2.5396 eV              | S <sub>10</sub> | A        | 3.5417 eV |
| T <sub>3</sub>  | E        | 2.5396 eV              | T <sub>19</sub> | E        | 3.5622 eV |
| T <sub>4</sub>  | A        | 2.5903 eV              | T <sub>20</sub> | E        | 3.5622 eV |
| T <sub>5</sub>  | A        | 2.7293 eV              | T <sub>21</sub> | A        | 3.5622 eV |
| S <sub>2</sub>  | E        | 2.8081 eV              | T <sub>22</sub> | E        | 3.6207 eV |
| S <sub>3</sub>  | E        | 2.8081 eV              | T <sub>23</sub> | E        | 3.6207 eV |
| T <sub>6</sub>  | E        | 2.8304 eV              | T <sub>24</sub> | A        | 3.6235 eV |
| T <sub>7</sub>  | E        | 2.8304 eV              | T <sub>25</sub> | A        | 3.7221 eV |
| S <sub>4</sub>  | A        | 2.8677 eV              | S <sub>11</sub> | E        | 3.8468 eV |
| S <sub>5</sub>  | E        | 2.9787 eV              | S <sub>12</sub> | E        | 3.8468 eV |
| S <sub>6</sub>  | E        | 2.9787 eV              | S <sub>13</sub> | E        | 3.9467 eV |
| S <sub>7</sub>  | A        | 3.0626 eV              | S <sub>14</sub> | E        | 3.9467 eV |
| T <sub>8</sub>  | E        | 3.0863 eV              | S <sub>15</sub> | A        | 3.9714 eV |
| T <sub>9</sub>  | E        | 3.0863 eV              | S <sub>16</sub> | E        | 4.0386 eV |
| T <sub>10</sub> | E        | 3.4191 eV              | S <sub>17</sub> | E        | 4.0386 eV |
| T <sub>11</sub> | E        | 3.4191 eV              | S <sub>18</sub> | A        | 4.0914 eV |
| T <sub>12</sub> | A        | 3.4191 eV              | S <sub>19</sub> | E        | 4.0966 eV |
| T <sub>13</sub> | E        | 3.4320 eV              | S <sub>20</sub> | E        | 4.0966 eV |
| T <sub>14</sub> | E        | 3.4320 eV              | S <sub>21</sub> | A        | 4.1324 eV |
| T <sub>15</sub> | A        | 3.4321 eV              | S <sub>22</sub> | E        | 4.1370 eV |
| T <sub>16</sub> | E        | 3.5207 eV              | S <sub>23</sub> | E        | 4.1370 eV |
| T <sub>17</sub> | E        | 3.5207 eV              | S <sub>24</sub> | A        | 4.2305 eV |
| T <sub>18</sub> | A        | 3.5407 eV              | S <sub>25</sub> | A        | 4.2588 eV |

**Table S22.** Electronic energy (EE) and first 25 singlet and 25 triplet vertical excitation energies of **HAP-3Cz** at the  $T_{1,\min}$  geometry.

| State           | Symmetry | Energy                 | State           | Symmetry | Energy    |
|-----------------|----------|------------------------|-----------------|----------|-----------|
| EE              | -        | -2852.9965468 hartrees |                 |          |           |
| T <sub>1</sub>  | A        | 2.1565 eV              | S <sub>8</sub>  | E        | 3.5763 eV |
| S <sub>1</sub>  | A        | 2.2717 eV              | S <sub>9</sub>  | E        | 3.5763 eV |
| T <sub>2</sub>  | E        | 2.5745 eV              | S <sub>10</sub> | A        | 3.5763 eV |
| T <sub>3</sub>  | E        | 2.5745 eV              | T <sub>19</sub> | E        | 3.5833 eV |
| T <sub>4</sub>  | A        | 2.6147 eV              | T <sub>20</sub> | E        | 3.5833 eV |
| T <sub>5</sub>  | A        | 2.7883 eV              | T <sub>21</sub> | A        | 3.5833 eV |
| S <sub>2</sub>  | E        | 2.8503 eV              | T <sub>22</sub> | E        | 3.6390 eV |
| S <sub>3</sub>  | E        | 2.8503 eV              | T <sub>23</sub> | E        | 3.6390 eV |
| T <sub>6</sub>  | E        | 2.8997 eV              | T <sub>24</sub> | A        | 3.6417 eV |
| T <sub>7</sub>  | E        | 2.8997 eV              | T <sub>25</sub> | A        | 3.7474 eV |
| S <sub>4</sub>  | A        | 2.9164 eV              | S <sub>11</sub> | E        | 3.8905 eV |
| S <sub>5</sub>  | E        | 3.0416 eV              | S <sub>12</sub> | E        | 3.8905 eV |
| S <sub>6</sub>  | E        | 3.0416 eV              | S <sub>13</sub> | E        | 3.9649 eV |
| S <sub>7</sub>  | A        | 3.0961 eV              | S <sub>14</sub> | E        | 3.9649 eV |
| T <sub>8</sub>  | E        | 3.1201 eV              | S <sub>15</sub> | A        | 3.9683 eV |
| T <sub>9</sub>  | E        | 3.1201 eV              | S <sub>16</sub> | E        | 4.0818 eV |
| T <sub>10</sub> | E        | 3.4285 eV              | S <sub>17</sub> | E        | 4.0818 eV |
| T <sub>11</sub> | E        | 3.4285 eV              | S <sub>18</sub> | A        | 4.1085 eV |
| T <sub>12</sub> | A        | 3.4285 eV              | S <sub>19</sub> | E        | 4.1185 eV |
| T <sub>13</sub> | E        | 3.4295 eV              | S <sub>20</sub> | E        | 4.1185 eV |
| T <sub>14</sub> | E        | 3.4295 eV              | S <sub>21</sub> | A        | 4.1309 eV |
| T <sub>15</sub> | A        | 3.4295 eV              | S <sub>22</sub> | E        | 4.1456 eV |
| T <sub>16</sub> | E        | 3.5555 eV              | S <sub>23</sub> | E        | 4.1456 eV |
| T <sub>17</sub> | E        | 3.5555 eV              | S <sub>24</sub> | A        | 4.2228 eV |
| T <sub>18</sub> | A        | 3.5659 eV              | S <sub>25</sub> | A        | 4.2578 eV |

**Table S23.** Electronic energy (EE) and first 25 singlet and 25 triplet vertical excitation energies of **HAP-3HMAT** at the FC geometry.

| State          | Symmetry       | Energy                 | State           | Symmetry       | Energy    |
|----------------|----------------|------------------------|-----------------|----------------|-----------|
| EE             | -              | -3906.0288704 hartrees |                 |                |           |
| T <sub>1</sub> | E              | 2.4326 eV              | T <sub>19</sub> | E              | 3.6536 eV |
| T <sub>2</sub> | E              | 2.4326 eV              | T <sub>20</sub> | E              | 3.6536 eV |
| T <sub>3</sub> | A <sub>1</sub> | 2.4695 eV              | T <sub>21</sub> | A <sub>1</sub> | 3.6590 eV |
| T <sub>4</sub> | A <sub>2</sub> | 2.5941 eV              | T <sub>22</sub> | -              | 3.6798 eV |
| S <sub>1</sub> | A <sub>2</sub> | 2.7572 eV              | S <sub>8</sub>  | E              | 3.6802 eV |
| S <sub>2</sub> | E              | 2.7964 eV              | S <sub>9</sub>  | E              | 3.6802 eV |
| S <sub>3</sub> | E              | 2.7964 eV              | T <sub>23</sub> | E              | 3.7138 eV |
| T <sub>5</sub> | A <sub>2</sub> | 3.0543 eV              | T <sub>24</sub> | E              | 3.7138 eV |
| S <sub>4</sub> | A <sub>2</sub> | 3.1430 eV              | S <sub>10</sub> | -              | 3.7241 eV |
| S <sub>5</sub> | A <sub>1</sub> | 3.1433 eV              | S <sub>11</sub> | A <sub>2</sub> | 3.7665 eV |
| T <sub>6</sub> | E              | 3.1786 eV              | S <sub>12</sub> | E              | 3.7763 eV |
| T <sub>7</sub> | E              | 3.1786 eV              | S <sub>13</sub> | E              | 3.7763 eV |
| T <sub>8</sub> | E              | 3.2128 eV              | T <sub>25</sub> | -              | 3.8308 eV |
| T <sub>9</sub> | E              | 3.2128 eV              | S <sub>14</sub> | A <sub>2</sub> | 3.8405 eV |
| S <sub>6</sub> | E              | 3.2878 eV              | S <sub>15</sub> | E              | 3.8913 eV |

|                 |                |           |                 |   |           |
|-----------------|----------------|-----------|-----------------|---|-----------|
| S <sub>7</sub>  | E              | 3.2878 eV | S <sub>16</sub> | E | 3.8913 eV |
| T <sub>10</sub> | A <sub>2</sub> | 3.3721 eV | S <sub>17</sub> | E | 4.0370 eV |
| T <sub>11</sub> | E              | 3.3748 eV | S <sub>18</sub> | E | 4.0370 eV |
| T <sub>12</sub> | E              | 3.3748 eV | S <sub>19</sub> | E | 4.1660 eV |
| T <sub>13</sub> | A <sub>1</sub> | 3.4790 eV | S <sub>20</sub> | E | 4.1660 eV |
| T <sub>14</sub> | E              | 3.4930 eV | S <sub>21</sub> | - | 4.1748 eV |
| T <sub>15</sub> | E              | 3.4930 eV | S <sub>22</sub> | - | 4.2150 eV |
| T <sub>16</sub> | -              | 3.4931 eV | S <sub>23</sub> | - | 4.2573 eV |
| T <sub>17</sub> | E              | 3.5055 eV | S <sub>24</sub> | - | 4.2573 eV |
| T <sub>18</sub> | E              | 3.5055 eV | S <sub>25</sub> | - | 4.2699 eV |

**Table S24.** Electronic energy (EE) and first 25 singlet and 25 triplet vertical excitation energies of HAP-3HMAT at the S<sub>1,min</sub> geometry.

| State           | Symmetry | Energy                 | State           | Symmetry | Energy    |
|-----------------|----------|------------------------|-----------------|----------|-----------|
| EE              | -        | -3906.0112511 hartrees |                 |          |           |
| T <sub>1</sub>  | A        | 2.0015 eV              | T <sub>19</sub> | A        | 3.5365 eV |
| S <sub>1</sub>  | A        | 2.0859 eV              | T <sub>20</sub> | A        | 3.5478 eV |
| T <sub>2</sub>  | A        | 2.2963 eV              | T <sub>21</sub> | A        | 3.5485 eV |
| T <sub>3</sub>  | A        | 2.2976 eV              | S <sub>8</sub>  | A        | 3.6700 eV |
| T <sub>4</sub>  | A        | 2.3797 eV              | S <sub>9</sub>  | A        | 3.6712 eV |
| S <sub>2</sub>  | A        | 2.6370 eV              | S <sub>10</sub> | A        | 3.6839 eV |
| S <sub>3</sub>  | A        | 2.6374 eV              | S <sub>11</sub> | A        | 3.6898 eV |
| T <sub>5</sub>  | A        | 2.7008 eV              | S <sub>12</sub> | A        | 3.6913 eV |
| T <sub>6</sub>  | A        | 2.8008 eV              | S <sub>13</sub> | A        | 3.7541 eV |
| T <sub>7</sub>  | A        | 2.8021 eV              | S <sub>14</sub> | A        | 3.7562 eV |
| S <sub>4</sub>  | A        | 2.8410 eV              | S <sub>15</sub> | A        | 3.7626 eV |
| S <sub>5</sub>  | A        | 2.9317 eV              | T <sub>22</sub> | A        | 3.7952 eV |
| S <sub>6</sub>  | A        | 2.9329 eV              | T <sub>23</sub> | A        | 3.8100 eV |
| S <sub>7</sub>  | A        | 3.0230 eV              | T <sub>24</sub> | A        | 3.8115 eV |
| T <sub>8</sub>  | A        | 3.0239 eV              | T <sub>25</sub> | A        | 3.8408 eV |
| T <sub>9</sub>  | A        | 3.0279 eV              | S <sub>16</sub> | A        | 3.9349 eV |
| T <sub>10</sub> | A        | 3.2637 eV              | S <sub>17</sub> | A        | 3.9355 eV |
| T <sub>11</sub> | A        | 3.2650 eV              | S <sub>18</sub> | A        | 3.9827 eV |
| T <sub>12</sub> | A        | 3.2699 eV              | S <sub>19</sub> | A        | 4.0903 eV |
| T <sub>13</sub> | A        | 3.4179 eV              | S <sub>20</sub> | A        | 4.0934 eV |
| T <sub>14</sub> | A        | 3.4349 eV              | S <sub>21</sub> | A        | 4.1406 eV |
| T <sub>15</sub> | A        | 3.4363 eV              | S <sub>22</sub> | A        | 4.1608 eV |
| T <sub>16</sub> | A        | 3.4960 eV              | S <sub>23</sub> | A        | 4.2006 eV |
| T <sub>17</sub> | A        | 3.4966 eV              | S <sub>24</sub> | A        | 4.2015 eV |
| T <sub>18</sub> | A        | 3.4973 eV              | S <sub>25</sub> | A        | 4.2027 eV |

**Table S25.** Electronic energy (EE) and first 25 singlet and 25 triplet vertical excitation energies of HAP-3HMAT at the T<sub>1,min</sub> geometry.

| State          | Symmetry | Energy                 | State           | Symmetry | Energy    |
|----------------|----------|------------------------|-----------------|----------|-----------|
| EE             | -        | -3906.0230631 hartrees |                 |          |           |
| T <sub>1</sub> | A'       | 2.1113 eV              | T <sub>19</sub> | A'       | 3.5230 eV |
| T <sub>2</sub> | A''      | 2.4801 eV              | S <sub>8</sub>  | A''      | 3.5860 eV |
| T <sub>3</sub> | A'       | 2.5046 eV              | T <sub>20</sub> | A''      | 3.6318 eV |

|                 |     |           |                 |     |           |
|-----------------|-----|-----------|-----------------|-----|-----------|
| T <sub>4</sub>  | A'' | 2.5574 eV | S <sub>9</sub>  | A'  | 3.6346 eV |
| S <sub>1</sub>  | A'  | 2.6479 eV | S <sub>10</sub> | A'  | 3.6532 eV |
| S <sub>2</sub>  | A'' | 2.7202 eV | T <sub>21</sub> | A'' | 3.6711 eV |
| S <sub>3</sub>  | A'' | 2.8104 eV | T <sub>22</sub> | A'  | 3.6854 eV |
| T <sub>5</sub>  | A'' | 3.0388 eV | T <sub>23</sub> | A'  | 3.7070 eV |
| S <sub>4</sub>  | A'  | 3.0999 eV | T <sub>24</sub> | A'' | 3.7344 eV |
| S <sub>5</sub>  | A'' | 3.1278 eV | T <sub>25</sub> | A'  | 3.7543 eV |
| T <sub>6</sub>  | A'' | 3.1346 eV | S <sub>11</sub> | A'' | 3.7688 eV |
| T <sub>7</sub>  | A'' | 3.1777 eV | S <sub>12</sub> | A'  | 3.7846 eV |
| T <sub>8</sub>  | A'  | 3.1815 eV | S <sub>13</sub> | A'' | 3.7887 eV |
| T <sub>9</sub>  | A'  | 3.2372 eV | S <sub>14</sub> | A'' | 3.8498 eV |
| S <sub>6</sub>  | A'' | 3.2409 eV | S <sub>15</sub> | A'  | 3.8908 eV |
| S <sub>7</sub>  | A'  | 3.2871 eV | S <sub>16</sub> | A'' | 3.9066 eV |
| T <sub>10</sub> | A'' | 3.3271 eV | S <sub>17</sub> | A'' | 4.0065 eV |
| T <sub>11</sub> | A'' | 3.3577 eV | S <sub>18</sub> | A'  | 4.0364 eV |
| T <sub>12</sub> | A'  | 3.3930 eV | S <sub>19</sub> | A'  | 4.0928 eV |
| T <sub>13</sub> | A'  | 3.4025 eV | S <sub>20</sub> | A'' | 4.1014 eV |
| T <sub>14</sub> | A'' | 3.4044 eV | S <sub>21</sub> | A'' | 4.1612 eV |
| T <sub>15</sub> | A'  | 3.4091 eV | S <sub>22</sub> | A'  | 4.1790 eV |
| T <sub>16</sub> | A'' | 3.4161 eV | S <sub>23</sub> | A'' | 4.1911 eV |
| T <sub>17</sub> | A'  | 3.4874 eV | S <sub>24</sub> | A'  | 4.2001 eV |
| T <sub>18</sub> | A'' | 3.4874 eV | S <sub>25</sub> | A'' | 4.2200 eV |

## D. Hole-electron analysis and spin-orbit coupling of low-lying $T_n$ states

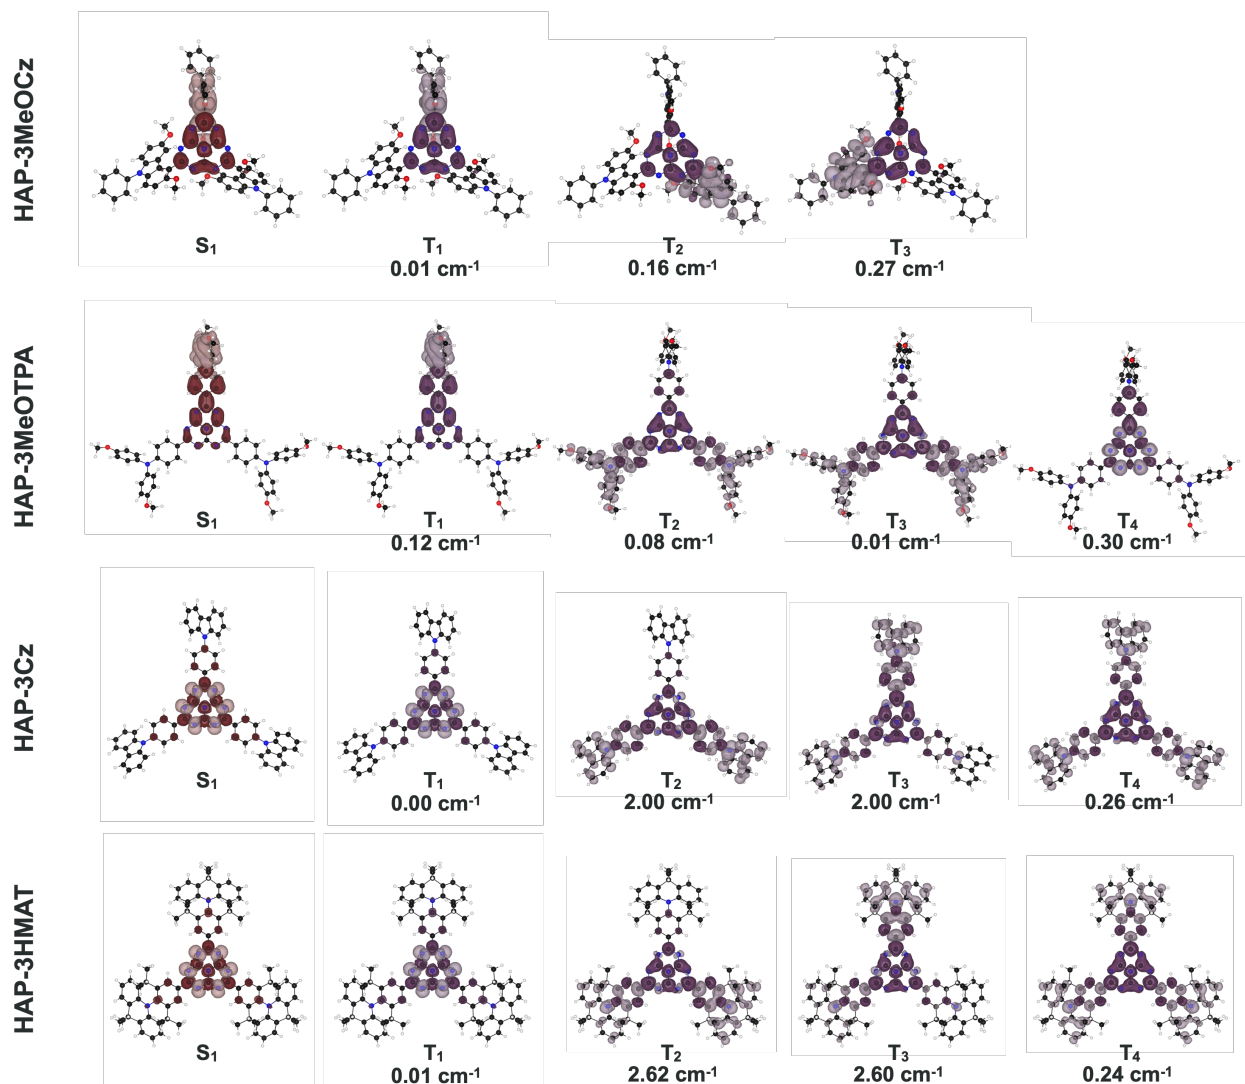

**Figure S1.** Hole (light) and electron (dark) analysis of the  $S_1$  state and all low-lying  $T_n$  states at the  $S_{1,\min}$  geometry. Spin orbit coupling constants are shown for the coupling between  $S_1$  and each  $T_n$  state.

## E. Calculation of $k_{\text{rISC}}$

**Experimental calculation:** Experimental values for the rISC rate constant ( $k_{\text{rISC}}$ ) were calculated according to equations 3 and 4. All data are from literature measurements in toluene solution with an optical density of 0.1 at  $\lambda_{\text{exc}} = 380$  nm.

**Table S26.** Values used to calculate the experimental  $k_{\text{rISC}}$ .

|                    | $\Phi_{N_2}$ | $\Phi_{\text{air}}$ | $\Phi_{\text{ISC}}$ | $\tau_{DF}$ ( $\mu\text{s}$ ) | $k_{\text{rISC}}$ ( $\text{s}^{-1}$ ) |
|--------------------|--------------|---------------------|---------------------|-------------------------------|---------------------------------------|
| <b>HAP-3MeOCz</b>  | 0.17         | 0.08                | 0.09                | 0.000139                      | <b>7.91E+03</b>                       |
| <b>HAP-3MeOTPA</b> | 0.59         | 0.31                | 0.28                | 0.000082                      | <b>1.69E+04</b>                       |
| <b>HAP-3Cz</b>     | 1            | 0.57                | 0.43                | 0.00000186                    | <b>9.43E+05</b>                       |
| <b>HAP-3HMAT</b>   | 1            | 0.98                | 0.02                | 0.000021                      | <b>4.86E+04</b>                       |

**Computational calculation:** Computational values for  $k_{\text{rISC}}$  were calculated according to equation 2. Superscripts in tables refer to the geometry at which the value was calculated at. All energies of the  $S_1$  and  $T_n$  states are relative to the ground state at the FC geometry. For  $T_n$  states that could not be optimized to a minimum, the minimum  $T_n$  energy along the FC to  $S_{1,\text{min}}$  to  $T_{1,\text{min}}$  PES was taken as the  $T_n$  energy.

**Table S27.** Values used to calculate the computational  $k_{\text{rISC}}$  for **HAP-3MeOCz**.

|                                           | $H_{S_0}^{S_1,\text{min}}$ (eV) | $S_1^{S_1,\text{min}}$ (eV) | $T_n^{T_n,\text{min}}$ (eV) | $S_1^{T_n,\text{min}}$ (eV) | $\Delta E_{ST_n}$ (eV) | $\lambda_n$ (eV) | $P_n$ (%) | Weighted $k_{\text{rISC}}$ ( $\text{s}^{-1}$ ) |
|-------------------------------------------|---------------------------------|-----------------------------|-----------------------------|-----------------------------|------------------------|------------------|-----------|------------------------------------------------|
| T <sub>1</sub>                            | 1.75E-06                        | 2.1497                      | 1.9023                      | 2.4546                      | 0.2474                 | 0.3049           | 99.998538 | 5.51E+00                                       |
| T <sub>2</sub>                            | 1.94E-05                        | 2.1497                      | 2.206                       | 2.4276                      | -0.0563                | 0.2779           | 0.000731  | 1.58E+01                                       |
| T <sub>3</sub>                            | 3.34E-05                        | 2.1497                      | 2.206                       | 2.4276                      | -0.0563                | 0.2779           | 0.000731  | 4.64E+01                                       |
| <b>Total <math>k_{\text{rISC}}</math></b> |                                 |                             |                             |                             |                        |                  |           | <b>6.77E+01</b>                                |

**Table S28.** Values used to calculate the computational  $k_{\text{rISC}}$  for **HAP-3MeOTPA**.

|                                           | $H_{S_0}^{S_1,\text{min}}$ (eV) | $S_1^{S_1,\text{min}}$ (eV) | $T_n^{T_n,\text{min}}$ (eV) | $S_1^{T_n,\text{min}}$ (eV) | $\Delta E_{ST_n}$ (eV) | $\lambda_n$ (eV) | $P_n$ (%) | Weighted $k_{\text{rISC}}$ ( $\text{s}^{-1}$ ) |
|-------------------------------------------|---------------------------------|-----------------------------|-----------------------------|-----------------------------|------------------------|------------------|-----------|------------------------------------------------|
| T <sub>1</sub>                            | 1.50E-05                        | 2.388                       | 2.1560                      | 2.6509                      | 0.2320                 | 0.2629           | 99.917754 | 8.46E+02                                       |
| T <sub>2</sub>                            | 1.00E-05                        | 2.388                       | 2.3443                      | 2.7758                      | 0.0437                 | 0.3878           | 0.065330  | 1.64E+01                                       |
| T <sub>3</sub>                            | 1.75E-06                        | 2.388                       | 2.3790                      | 2.7758                      | 0.0090                 | 0.3878           | 0.016915  | 2.69E-01                                       |
| T <sub>4</sub>                            | 3.72E-05                        | 2.388                       | 2.6299                      | 2.7758                      | -0.2419                | 0.3878           | 0.000001  | 2.11E-01                                       |
| <b>Total <math>k_{\text{rISC}}</math></b> |                                 |                             |                             |                             |                        |                  |           | <b>8.63E+02</b>                                |

**Table S29.** Values used to calculate the computational  $k_{\text{rISC}}$  for **HAP-3Cz**.

|                                           | $H_{S_0}^{S_1,\text{min}}$ (eV) | $S_1^{S_1,\text{min}}$ (eV) | $T_n^{T_n,\text{min}}$ (eV) | $S_1^{T_n,\text{min}}$ (eV) | $\Delta E_{ST_n}$ (eV) | $\lambda_n$ (eV) | $P_n$ (%) | Weighted $k_{\text{rISC}}$ ( $\text{s}^{-1}$ ) |
|-------------------------------------------|---------------------------------|-----------------------------|-----------------------------|-----------------------------|------------------------|------------------|-----------|------------------------------------------------|
| T <sub>1</sub>                            | 0                               | 2.5976                      | 2.4915                      | 2.6067                      | 0.1061                 | 0.0091           | 99.865804 | 0.00E+00                                       |
| T <sub>2</sub>                            | 2.48E-04                        | 2.5976                      | 2.6845                      | 2.7646                      | -0.0869                | 0.167            | 0.054375  | 9.49E+05                                       |
| T <sub>3</sub>                            | 2.48E-04                        | 2.5976                      | 2.6845                      | 2.7646                      | -0.0869                | 0.167            | 0.054375  | 9.49E+05                                       |
| T <sub>4</sub>                            | 3.23E-05                        | 2.5976                      | 2.704                       | 2.7646                      | -0.1064                | 0.167            | 0.025446  | 8.79E+03                                       |
| <b>Total <math>k_{\text{rISC}}</math></b> |                                 |                             |                             |                             |                        |                  |           | <b>1.91E+06</b>                                |

**Table S30.** Values used to calculate the computational  $k_{\text{risc}}$  for **HAP-3HMAT**.

|                                           | $H_{S_0}^{S_1, \text{min}}$ (eV) | $S_1^{S_1, \text{min}}$ (eV) | $T_n^{T_n, \text{min}}$ (eV) | $S_1^{T_n, \text{min}}$ (eV) | $\Delta E_{ST_n}$ (eV) | $\lambda_n$ (eV) | $P_n$ (%) | Weighted $k_{\text{risc}}$ ( $\text{s}^{-1}$ ) |
|-------------------------------------------|----------------------------------|------------------------------|------------------------------|------------------------------|------------------------|------------------|-----------|------------------------------------------------|
| T <sub>1</sub>                            | 3.25E-04                         | 2.5653                       | 2.2693                       | 2.8782                       | 0.2960                 | 0.3129           | 99.757392 | 3.08E+04                                       |
| T <sub>2</sub>                            | 3.23E-04                         | 2.5653                       | 2.4326                       | 2.7572                       | 0.1327                 | 0.1919           | 0.172669  | 3.30E+04                                       |
| T <sub>3</sub>                            | 2.98E-05                         | 2.5653                       | 2.4695                       | 2.7572                       | 0.0958                 | 0.1919           | 0.041036  | 2.10E+02                                       |
| T <sub>4</sub>                            | 1.24E-06                         | 2.5653                       | 2.4785                       | 2.5711                       | 0.0868                 | 0.0065           | 0.028904  | 2.02E-04                                       |
| <b>Total <math>k_{\text{risc}}</math></b> |                                  |                              |                              |                              |                        |                  |           | <b>6.40E+04</b>                                |

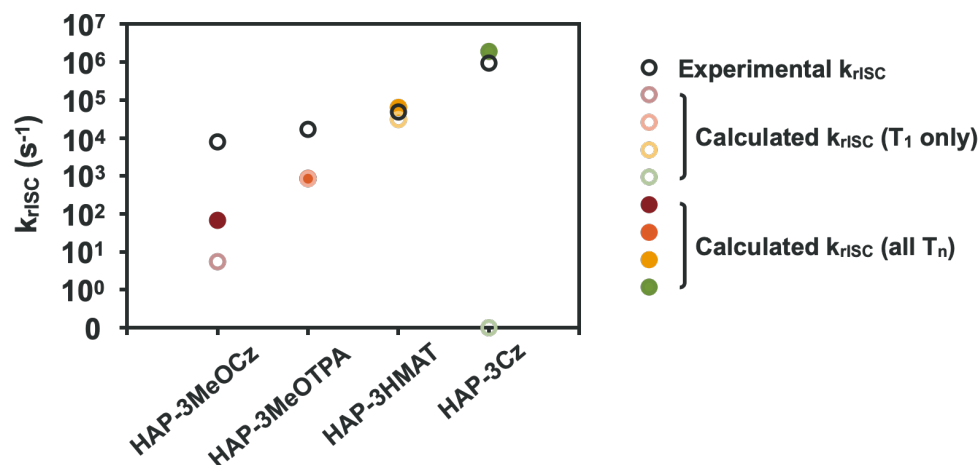

**Figure S2.** Comparison of experimental  $k_{\text{risc}}$  values with the computational values calculated by considering the T<sub>1</sub> states only (equation 1) or by considering all T<sub>n</sub> states with energies below S<sub>1</sub> (equation 2).

## F. References

- 1 T. Stein, L. Kronik and R. Baer, *J. Am. Chem. Soc.*, 2009, **131**, 2818–2820.
- 2 T. M. Henderson, A. F. Izmaylov, G. Scalmani and G. E. Scuseria, *J. Chem. Phys.*, 2009, **131**, 044108.
- 3 R. Ditchfield, W. J. Hehre and J. A. Pople, *J. Chem. Phys.*, 1971, **54**, 720–723.
- 4 J. P. Perdew, K. Burke and M. Ernzerhof, *Phys. Rev. Lett.*, 1996, **77**, 3865–3868.
- 5 S. Smidstrup, A. Pedersen, K. Stokbro and H. Jónsson, *J. Chem. Phys.*, 2014, **140**, 1–14.
